# Supplementary material
Source: PubMed Central journal article supplement (PMC5388357)

# THE LANCET

## Supplementary appendix

This appendix formed part of the original submission and has been peer reviewed. We post it as supplied by the authors.

Supplement to: Shiels MS, Chernyavskiy P, Anderson WF, et al. Trends in premature mortality in the USA by sex, race, and ethnicity from 1999 to 2014: an analysis of death certificate data. *Lancet* 2017; published online Jan 25. [http://dx.doi.org/10.1016/S0140-6736\(17\)30187-3](http://dx.doi.org/10.1016/S0140-6736(17)30187-3).

## **Supplemental Appendix Table of Contents**

**Page 2: Supplemental Methods**

**Page 4: Supplemental Table 1. Cause of death definitions based on ICD-10 codes.**

**Page 5: Supplemental Table 2: Estimated annual percentage change (APC) in all-cause mortality by age and sex in Canada, and England and Wales and by age, sex and race and ethnicity in the USA, 1999-2014**

**Page 10: Supplemental Table 3. Age-adjusted all-cause mortality rates in U.S. men and women by race/ethnicity, age group and calendar period, 1999-2014.**

**Page 13: Supplemental Table 4: Age-standardized mortality rates by race/ethnicity, sex, age group, calendar period and cause of death.**

**Page 29: Supplemental Table 5: ICD-10 codes for sub-categories of accidental deaths.**

**Page 31: Supplemental Figure 1. Birth cohort relative risks of mortality among 25-64 year-olds by sex in A) Canada, England/Wales, and the United States, and B) the United States by race and ethnicity.**

**Page 33: Supplemental Figure 2. Age-adjusted mortality rates for deaths due to accidental poisonings by sex and race/ethnicity among 25-49 year-olds during 2011-2014.**

## Supplemental Methods

The traditional age-period-cohort (APC) model represents expected mortality rates as a log-linear model with additive age, period, and cohort effects. Because cohort is collinear with age and period, APC models can be written in either the age-period cross-sectional form or the age-cohort longitudinal form.<sup>1</sup> In this paper, we use the latter specification, but the fitted rates are identical. Omitting the offset, the linear predictor can be expressed in scalar notation as:

$$\log(\mu_{apc}) = \beta_0 + \beta_a(a - \bar{a}) + \beta_c(c - \bar{c}) + \tilde{\alpha}_a + \tilde{\pi}_p + \tilde{\gamma}_c \quad (1)$$

In equation (1), the intercept  $\beta_0$  represents the log-rate centered at mean age  $\bar{a}$  and mean birth cohort  $\bar{c}$ ,  $(a - \bar{a})$  and  $(c - \bar{c})$  are the centered effects of age and birth cohort,  $\beta_a$  and  $\beta_c$  are the corresponding linear trend parameters, and  $\tilde{\alpha}_a$ ,  $\tilde{\pi}_p$ , and  $\tilde{\gamma}_c$  are the categorical age, period, and cohort deviations from linear trends. Deviation parameters must be constrained for identifiability, such that:  $\sum_a \tilde{\alpha}_a = \sum_p \tilde{\pi}_p = \sum_c \tilde{\gamma}_c = 0$  and  $\sum_a \tilde{\alpha}_a(a - \bar{a}) = \sum_p \tilde{\pi}_p(p - \bar{p}) = \sum_c \tilde{\gamma}_c(c - \bar{c}) = 0$ .<sup>2</sup> Note that this constraint does not limit the magnitude of trends *a priori*, but instead reflects the uncertainty in modeling the effects of age separately from period/cohort, and vice versa.<sup>1</sup> Parameters are estimated by numerically maximizing the Poisson log-likelihood with respect to  $\beta_0$ ,  $\beta_a$ ,  $\beta_c$ ,  $\tilde{\alpha}_a$ ,  $\tilde{\pi}_p$ , and  $\tilde{\gamma}_c$ .

In practice,  $\beta_a$  is called the ‘Longitudinal Age Trend’ (LAT) and  $\beta_c$  the ‘Net Drift’.<sup>3</sup> Age, period, and cohort deviations are combined with trend parameters to construct APC estimable functions, for example: cohort relative risk (RR), and age-specific annual percent change, called the “Local Drifts”.<sup>4</sup> Rosenberg and Anderson provide a comprehensive overview of such estimable functions and demonstrate their utility in studies of incidence rates.<sup>3</sup>

APC models are a subset of General Linear Models (GLM), thus the uncertainty in parameter estimates can be computed using standard methods. More specifically, the variance-covariance matrix for all model parameters is expressed as  $\sigma^2 (X^T V X)^{-1}$ , where  $X$  is the APC design matrix,  $V$  is a diagonal matrix with the fitted means  $\hat{\mu}_{apc}$  on the main diagonal, and  $\sigma^2$  is assumed to be 1 following standard Poisson GLM specifications. For computational details of APC parameter standard errors, including cohort RR and Local Drifts, please see descriptions by Rosenberg et al.<sup>4</sup> and the R code for the APC analysis web-tool (<https://analysistools.nci.nih.gov/apc/>).

## References

1. Rosenberg PS, Anderson WF. Proportional hazards models and age-period-cohort analysis of cancer rates. *Stat Med* 2010; **29**(11): 1228-38.
2. Holford TR. Understanding the effects of age, period, and cohort on incidence and mortality rates. *Annu Rev Public Health* 1991; **12**: 425-57.
3. Rosenberg PS, Anderson WF. Age-period-cohort models in cancer surveillance research: ready for prime time? *Cancer Epidemiol Biomarkers Prev* 2011; **20**(7): 1263-8.
4. Rosenberg PS, Check DP, Anderson WF. A web tool for age-period-cohort analysis of cancer incidence and mortality rates. *Cancer Epidemiol Biomarkers Prev* 2014; **23**(11): 2296-302.

**Table S1. Cause of death definitions based on ICD-10 codes.**

| Cause of Death                                      | SEER Cause of Death Label                             | ICD-10 codes                                         |
|-----------------------------------------------------|-------------------------------------------------------|------------------------------------------------------|
| Cancer                                              | All Malignant Cancers                                 | C00-C97                                              |
| In situ, benign or unknown behavior neoplasm        | In situ, benign or unknown behavior neoplasm          | D00-D48                                              |
| Tuberculosis                                        | Tuberculosis                                          | A15-A19                                              |
| Syphilis                                            | Syphilis                                              | A50-A53                                              |
| HIV                                                 | Human Immunodeficiency Virus (HIV) (1987+)            | B20-B24                                              |
| Septicemia                                          | Septicemia                                            | A40-A41                                              |
| Other Infectious/Parasitic Diseases                 | Other Infectious and Parasitic Diseases               | A00-A08, A20-A33, A35-A39, A42-A49, A54-B19, B25-B99 |
| Diabetes Mellitus                                   | Diabetes Mellitus                                     | E10-E14                                              |
| Alzheimers                                          | Alzheimers (ICD-9 and 10 only)                        | G30                                                  |
| Heart Disease                                       | Diseases of Heart                                     | I00-I09, I11, I13, I20-I51                           |
| Hypertension                                        | Hypertension without Heart Disease                    | I10, I12                                             |
| Cerebrovascular Diseases                            | Cerebrovascular Diseases                              | I60-I69                                              |
| Atherosclerosis                                     | Atherosclerosis                                       | I70                                                  |
| Aortic Aneurysm and Dissection                      | Aortic Aneurysm and Dissection                        | I71                                                  |
| Other Diseases of Arteries, Arterioles, Capillaries | Other Diseases of Arteries, Arterioles, Capillaries   | I72-I78                                              |
| Pneumonia and Influenza                             | Pneumonia and Influenza                               | J09-J18                                              |
| COPD                                                | Chronic Obstructive Pulmonary Disease and Allied Cond | J40-J47                                              |
| Stomach and Duodenal Ulcers                         | Stomach and Duodenal Ulcers                           | K25-K28                                              |
| Chronic Liver Disease/Cirrhosis                     | Chronic Liver Disease and Cirrhosis                   | K70, K73-K74                                         |
| Nephritis                                           | Nephritis, Nephrotic Syndrome and Nephrosis           | N00-N07, N17-N19, N25-N27                            |
| Complications of Pregnancy                          | Complications of Pregnancy, Childbirth, Puerperium    | A34, O00-O95, O98-O99                                |
| Congenital Anomalies                                | Congenital Anomalies                                  | Q00-Q99                                              |
| Conditions of the Perinatal Period                  | Certain Conditions Originating in Perinatal Period    | P00-P96                                              |
| Ill-Defined Conditions                              | Symptoms, Signs and Ill-Defined Conditions            | R00-R99                                              |
| Accidents                                           | Accidents and Adverse Effects                         | V01-X59, Y85-Y86                                     |
| Suicide                                             | Suicide and Self-Inflicted Injury                     | U03, X60-X84, Y87.0                                  |
| Homicide and Legal Intervention                     | Homicide and Legal Intervention                       | U01-U02, X85-Y09, Y35, Y87.1, Y89.0                  |
| Other Cause of Death                                | Other Cause of Death                                  | --                                                   |

**Table S2. Estimated annual percentage change (APC) in all-cause mortality by age and sex in Canada, and England and Wales and by age, sex and race and ethnicity in the USA, 1999-2014**

| Country | Age               | Estimated APC | Women     |           | Estimated APC | Men       |           |       |
|---------|-------------------|---------------|-----------|-----------|---------------|-----------|-----------|-------|
|         |                   |               | 95% CI LL | 95% CI UL |               | 95% CI LL | 95% CI UL |       |
| Canada  | 25                | -0.57         | -0.98     | -0.16     | -0.72         | -1.03     | -0.41     |       |
|         | 26                | -0.13         | -0.50     | 0.24      | -0.60         | -0.88     | -0.33     |       |
|         | 27                | 0.02          | -0.33     | 0.38      | -0.73         | -0.99     | -0.46     |       |
|         | 28                | -0.12         | -0.46     | 0.22      | -0.99         | -1.24     | -0.73     |       |
|         | 29                | -0.33         | -0.66     | 0.00      | -1.31         | -1.56     | -1.06     |       |
|         | 30                | -0.60         | -0.93     | -0.27     | -1.61         | -1.86     | -1.37     |       |
|         | 31                | -0.88         | -1.20     | -0.55     | -1.89         | -2.14     | -1.65     |       |
|         | 32                | -1.07         | -1.39     | -0.74     | -2.07         | -2.31     | -1.83     |       |
|         | 33                | -1.19         | -1.51     | -0.87     | -2.19         | -2.42     | -1.95     |       |
|         | 34                | -1.31         | -1.63     | -0.99     | -2.23         | -2.47     | -2.00     |       |
|         | 35                | -1.43         | -1.74     | -1.11     | -2.23         | -2.47     | -2.00     |       |
|         | 36                | -1.51         | -1.82     | -1.19     | -2.20         | -2.43     | -1.96     |       |
|         | 37                | -1.57         | -1.89     | -1.26     | -2.13         | -2.36     | -1.89     |       |
|         | 38                | -1.61         | -1.92     | -1.29     | -2.02         | -2.25     | -1.79     |       |
|         | 39                | -1.60         | -1.91     | -1.28     | -1.89         | -2.12     | -1.66     |       |
|         | 40                | -1.55         | -1.86     | -1.23     | -1.75         | -1.98     | -1.52     |       |
|         | 41                | -1.46         | -1.78     | -1.15     | -1.63         | -1.86     | -1.39     |       |
|         | 42                | -1.36         | -1.67     | -1.04     | -1.54         | -1.78     | -1.31     |       |
|         | 43                | -1.24         | -1.56     | -0.93     | -1.51         | -1.74     | -1.27     |       |
|         | 44                | -1.13         | -1.45     | -0.81     | -1.52         | -1.76     | -1.28     |       |
|         | 45                | -1.02         | -1.34     | -0.70     | -1.57         | -1.81     | -1.33     |       |
|         | 46                | -0.91         | -1.24     | -0.59     | -1.63         | -1.87     | -1.39     |       |
|         | 47                | -0.81         | -1.14     | -0.48     | -1.68         | -1.92     | -1.43     |       |
|         | 48                | -0.73         | -1.07     | -0.39     | -1.69         | -1.94     | -1.44     |       |
|         | 49                | -0.67         | -1.01     | -0.32     | -1.66         | -1.91     | -1.41     |       |
|         | 50                | -0.63         | -0.99     | -0.28     | -1.60         | -1.85     | -1.33     |       |
|         | 51                | -0.65         | -1.01     | -0.28     | -1.51         | -1.78     | -1.24     |       |
|         | 52                | -0.72         | -1.10     | -0.35     | -1.43         | -1.71     | -1.15     |       |
|         | 53                | -0.88         | -1.27     | -0.49     | -1.39         | -1.68     | -1.11     |       |
|         | 54                | -1.05         | -1.84     | -0.26     | -1.54         | -2.05     | -1.03     |       |
|         | 55                | -1.47         | -2.29     | -0.64     | -1.90         | -2.43     | -1.36     |       |
|         | 56                | -2.08         | -2.87     | -1.29     | -2.21         | -2.73     | -1.68     |       |
|         | 57                | -2.82         | -3.54     | -2.09     | -2.49         | -2.99     | -1.99     |       |
|         | 58                | -3.18         | -3.85     | -2.51     | -2.76         | -3.22     | -2.30     |       |
|         | 59                | -3.31         | -3.93     | -2.68     | -2.86         | -3.29     | -2.42     |       |
|         | 60                | -3.06         | -3.66     | -2.46     | -2.77         | -3.19     | -2.36     |       |
|         | 61                | -2.66         | -3.29     | -2.03     | -2.56         | -2.98     | -2.14     |       |
|         | 62                | -2.11         | -2.82     | -1.39     | -2.22         | -2.68     | -1.76     |       |
|         | 63                | -1.45         | -2.30     | -0.60     | -1.75         | -2.29     | -1.21     |       |
|         | 64                | -0.80         | -1.82     | 0.22      | -1.24         | -1.87     | -0.59     |       |
|         | England and Wales | 25            | -0.47     | -0.89     | -0.04         | 0.00      | -0.33     | 0.32  |
|         |                   | 26            | -0.36     | -0.74     | 0.03          | 0.20      | -0.10     | 0.49  |
|         |                   | 27            | -0.61     | -0.98     | -0.24         | -0.07     | -0.36     | 0.21  |
|         |                   | 28            | -0.99     | -1.35     | -0.63         | -0.57     | -0.84     | -0.29 |
|         |                   | 29            | -1.37     | -1.73     | -1.01         | -1.14     | -1.41     | -0.87 |
|         |                   | 30            | -1.67     | -2.02     | -1.32         | -1.66     | -1.92     | -1.39 |
|         |                   | 31            | -1.88     | -2.23     | -1.53         | -2.04     | -2.31     | -1.78 |
|         |                   | 32            | -1.97     | -2.32     | -1.62         | -2.21     | -2.47     | -1.94 |
|         |                   | 33            | -1.96     | -2.31     | -1.62         | -2.20     | -2.46     | -1.94 |
|         |                   | 34            | -1.89     | -2.23     | -1.54         | -2.05     | -2.31     | -1.79 |
|         |                   | 35            | -1.77     | -2.11     | -1.42         | -1.85     | -2.11     | -1.59 |
|         |                   | 36            | -1.64     | -1.98     | -1.29         | -1.65     | -1.91     | -1.39 |
|         |                   | 37            | -1.54     | -1.88     | -1.19         | -1.50     | -1.76     | -1.24 |
|         |                   | 38            | -1.45     | -1.79     | -1.11         | -1.42     | -1.68     | -1.16 |
|         | 39                | -1.38         | -1.72     | -1.03     | -1.40         | -1.66     | -1.14     |       |
|         | 40                | -1.32         | -1.66     | -0.98     | -1.46         | -1.72     | -1.20     |       |
|         | 41                | -1.30         | -1.65     | -0.96     | -1.58         | -1.84     | -1.33     |       |
|         | 42                | -1.33         | -1.67     | -0.99     | -1.77         | -2.03     | -1.51     |       |
|         | 43                | -1.41         | -1.75     | -1.07     | -2.00         | -2.25     | -1.74     |       |
|         | 44                | -1.54         | -1.88     | -1.19     | -2.25         | -2.51     | -2.00     |       |
|         | 45                | -1.71         | -2.05     | -1.36     | -2.52         | -2.78     | -2.26     |       |
|         | 46                | -1.89         | -2.24     | -1.54     | -2.78         | -3.04     | -2.52     |       |
|         | 47                | -2.07         | -2.42     | -1.72     | -3.01         | -3.27     | -2.75     |       |

|                                        |    |       |       |       |       |       |       |
|----------------------------------------|----|-------|-------|-------|-------|-------|-------|
|                                        | 48 | -2.20 | -2.56 | -1.85 | -3.20 | -3.46 | -2.93 |
|                                        | 49 | -2.28 | -2.65 | -1.92 | -3.31 | -3.58 | -3.04 |
|                                        | 50 | -2.30 | -2.67 | -1.92 | -3.34 | -3.61 | -3.06 |
|                                        | 51 | -2.25 | -2.64 | -1.87 | -3.26 | -3.54 | -2.98 |
|                                        | 52 | -2.17 | -2.57 | -1.77 | -3.08 | -3.37 | -2.79 |
|                                        | 53 | -2.07 | -2.48 | -1.66 | -2.79 | -3.09 | -2.48 |
|                                        | 54 | -1.32 | -2.23 | -0.40 | -1.69 | -2.29 | -1.09 |
|                                        | 55 | -1.37 | -2.31 | -0.43 | -0.55 | -1.19 | 0.09  |
|                                        | 56 | -1.49 | -2.38 | -0.59 | -0.06 | -0.68 | 0.56  |
|                                        | 57 | -1.44 | -2.27 | -0.61 | 0.20  | -0.38 | 0.79  |
|                                        | 58 | -1.38 | -2.13 | -0.61 | 0.31  | -0.22 | 0.85  |
|                                        | 59 | -1.55 | -2.25 | -0.84 | 0.19  | -0.31 | 0.68  |
|                                        | 60 | -1.70 | -2.38 | -1.02 | -0.13 | -0.60 | 0.35  |
|                                        | 61 | -1.86 | -2.57 | -1.15 | -0.75 | -1.24 | -0.26 |
|                                        | 62 | -2.02 | -2.84 | -1.20 | -1.53 | -2.07 | -0.98 |
|                                        | 63 | -2.15 | -3.12 | -1.17 | -2.47 | -3.11 | -1.83 |
|                                        | 64 | -2.33 | -3.49 | -1.15 | -3.47 | -4.22 | -2.72 |
| United States - All                    | 25 | 1.09  | 0.98  | 1.19  | 0.17  | 0.07  | 0.27  |
|                                        | 26 | 1.03  | 0.93  | 1.12  | -0.07 | -0.16 | 0.02  |
|                                        | 27 | 0.90  | 0.81  | 0.99  | -0.34 | -0.43 | -0.25 |
|                                        | 28 | 0.75  | 0.66  | 0.84  | -0.60 | -0.68 | -0.52 |
|                                        | 29 | 0.56  | 0.48  | 0.65  | -0.81 | -0.89 | -0.73 |
|                                        | 30 | 0.39  | 0.31  | 0.48  | -0.94 | -1.02 | -0.87 |
|                                        | 31 | 0.17  | 0.09  | 0.25  | -1.11 | -1.18 | -1.03 |
|                                        | 32 | -0.07 | -0.15 | 0.01  | -1.27 | -1.34 | -1.19 |
|                                        | 33 | -0.31 | -0.39 | -0.23 | -1.37 | -1.45 | -1.30 |
|                                        | 34 | -0.53 | -0.61 | -0.45 | -1.41 | -1.48 | -1.34 |
|                                        | 35 | -0.69 | -0.77 | -0.61 | -1.38 | -1.45 | -1.31 |
|                                        | 36 | -0.84 | -0.92 | -0.76 | -1.32 | -1.40 | -1.25 |
|                                        | 37 | -1.03 | -1.11 | -0.95 | -1.32 | -1.39 | -1.25 |
|                                        | 38 | -1.05 | -1.12 | -0.97 | -1.13 | -1.20 | -1.06 |
|                                        | 39 | -1.04 | -1.12 | -0.97 | -0.97 | -1.04 | -0.90 |
|                                        | 40 | -0.94 | -1.02 | -0.87 | -0.74 | -0.81 | -0.67 |
|                                        | 41 | -0.78 | -0.86 | -0.71 | -0.53 | -0.60 | -0.46 |
|                                        | 42 | -0.63 | -0.70 | -0.55 | -0.37 | -0.44 | -0.30 |
|                                        | 43 | -0.46 | -0.54 | -0.39 | -0.22 | -0.29 | -0.15 |
|                                        | 44 | -0.29 | -0.37 | -0.22 | -0.10 | -0.17 | -0.03 |
|                                        | 45 | -0.08 | -0.15 | 0.00  | 0.06  | -0.01 | 0.13  |
|                                        | 46 | 0.11  | 0.04  | 0.19  | 0.12  | 0.05  | 0.19  |
|                                        | 47 | 0.16  | 0.09  | 0.24  | 0.10  | 0.03  | 0.16  |
|                                        | 48 | 0.16  | 0.08  | 0.23  | 0.01  | -0.05 | 0.08  |
|                                        | 49 | -0.10 | -0.24 | 0.03  | -0.37 | -0.48 | -0.26 |
|                                        | 50 | -0.39 | -0.53 | -0.25 | -0.70 | -0.81 | -0.58 |
|                                        | 51 | -0.60 | -0.73 | -0.46 | -0.96 | -1.07 | -0.85 |
|                                        | 52 | -0.88 | -1.01 | -0.76 | -1.29 | -1.39 | -1.18 |
|                                        | 53 | -1.08 | -1.20 | -0.97 | -1.53 | -1.63 | -1.43 |
|                                        | 54 | -1.23 | -1.35 | -1.12 | -1.77 | -1.87 | -1.67 |
|                                        | 55 | -1.34 | -1.44 | -1.23 | -1.97 | -2.06 | -1.87 |
|                                        | 56 | -1.37 | -1.48 | -1.26 | -2.02 | -2.11 | -1.92 |
|                                        | 57 | -1.41 | -1.51 | -1.30 | -2.09 | -2.18 | -1.99 |
|                                        | 58 | -1.33 | -1.44 | -1.22 | -2.05 | -2.15 | -1.96 |
|                                        | 59 | -1.25 | -1.37 | -1.13 | -1.98 | -2.08 | -1.87 |
|                                        | 60 | -1.06 | -1.19 | -0.93 | -1.77 | -1.88 | -1.66 |
|                                        | 61 | -0.76 | -0.91 | -0.62 | -1.39 | -1.51 | -1.27 |
|                                        | 62 | -0.43 | -0.59 | -0.27 | -1.01 | -1.14 | -0.88 |
|                                        | 63 | -0.05 | -0.22 | 0.13  | -0.55 | -0.69 | -0.40 |
|                                        | 64 | 0.28  | 0.09  | 0.48  | -0.11 | -0.27 | 0.05  |
| USA - American Indian or Alaska Native | 25 | 4.96  | 3.86  | 6.07  | 2.70  | 1.79  | 3.62  |
|                                        | 26 | 4.94  | 3.98  | 5.90  | 2.59  | 1.82  | 3.36  |
|                                        | 27 | 4.94  | 4.07  | 5.81  | 2.58  | 1.90  | 3.27  |
|                                        | 28 | 4.78  | 3.96  | 5.60  | 2.29  | 1.65  | 2.93  |
|                                        | 29 | 4.47  | 3.69  | 5.26  | 1.99  | 1.38  | 2.60  |
|                                        | 30 | 4.27  | 3.51  | 5.03  | 1.90  | 1.32  | 2.48  |
|                                        | 31 | 3.91  | 3.17  | 4.65  | 1.91  | 1.35  | 2.48  |
|                                        | 32 | 3.50  | 2.78  | 4.22  | 1.69  | 1.14  | 2.24  |
|                                        | 33 | 3.10  | 2.40  | 3.81  | 1.32  | 0.79  | 1.86  |
|                                        | 34 | 2.73  | 2.05  | 3.42  | 1.20  | 0.68  | 1.72  |
|                                        | 35 | 2.45  | 1.78  | 3.13  | 1.29  | 0.78  | 1.80  |
|                                        | 36 | 2.25  | 1.59  | 2.92  | 1.14  | 0.64  | 1.64  |
|                                        | 37 | 1.76  | 1.12  | 2.41  | 1.05  | 0.57  | 1.54  |

|                                 |    |       |       |       |       |       |       |
|---------------------------------|----|-------|-------|-------|-------|-------|-------|
|                                 | 38 | 1.60  | 0.97  | 2.24  | 1.05  | 0.57  | 1.53  |
|                                 | 39 | 1.28  | 0.66  | 1.91  | 1.11  | 0.64  | 1.58  |
|                                 | 40 | 1.15  | 0.54  | 1.77  | 1.03  | 0.57  | 1.50  |
|                                 | 41 | 0.92  | 0.31  | 1.54  | 0.85  | 0.40  | 1.32  |
|                                 | 42 | 0.88  | 0.27  | 1.49  | 0.79  | 0.33  | 1.24  |
|                                 | 43 | 0.77  | 0.16  | 1.38  | 0.65  | 0.19  | 1.10  |
|                                 | 44 | 0.87  | 0.26  | 1.48  | 0.65  | 0.19  | 1.10  |
|                                 | 45 | 0.99  | 0.38  | 1.59  | 0.75  | 0.30  | 1.21  |
|                                 | 46 | 1.08  | 0.48  | 1.69  | 0.85  | 0.40  | 1.31  |
|                                 | 47 | 0.99  | 0.39  | 1.59  | 0.84  | 0.39  | 1.29  |
|                                 | 48 | 0.95  | 0.35  | 1.55  | 0.97  | 0.52  | 1.42  |
|                                 | 49 | 1.10  | 0.13  | 2.08  | 1.16  | 0.47  | 1.84  |
|                                 | 50 | 1.23  | 0.22  | 2.25  | 1.15  | 0.45  | 1.87  |
|                                 | 51 | 1.16  | 0.17  | 2.16  | 1.18  | 0.49  | 1.88  |
|                                 | 52 | 0.78  | -0.15 | 1.72  | 1.10  | 0.43  | 1.78  |
|                                 | 53 | 1.06  | 0.16  | 1.98  | 0.88  | 0.23  | 1.54  |
|                                 | 54 | 0.73  | -0.13 | 1.61  | 0.85  | 0.21  | 1.50  |
|                                 | 55 | 0.60  | -0.26 | 1.46  | 0.98  | 0.34  | 1.62  |
|                                 | 56 | 0.33  | -0.51 | 1.18  | 0.89  | 0.26  | 1.52  |
|                                 | 57 | 0.67  | -0.19 | 1.54  | 0.83  | 0.20  | 1.47  |
|                                 | 58 | 0.73  | -0.15 | 1.61  | 0.74  | 0.10  | 1.38  |
|                                 | 59 | 1.05  | 0.13  | 1.97  | 0.71  | 0.06  | 1.37  |
|                                 | 60 | 1.36  | 0.39  | 2.34  | 0.68  | 0.00  | 1.36  |
|                                 | 61 | 1.84  | 0.79  | 2.91  | 0.85  | 0.13  | 1.58  |
|                                 | 62 | 2.23  | 1.08  | 3.40  | 0.93  | 0.16  | 1.71  |
|                                 | 63 | 2.22  | 0.95  | 3.51  | 1.12  | 0.28  | 1.98  |
|                                 | 64 | 2.33  | 0.92  | 3.76  | 1.27  | 0.34  | 2.21  |
| USA - Asian or Pacific Islander | 25 | -0.53 | -1.14 | 0.09  | 0.07  | -0.43 | 0.57  |
|                                 | 26 | -0.74 | -1.29 | -0.19 | -0.11 | -0.54 | 0.32  |
|                                 | 27 | -0.98 | -1.49 | -0.46 | -0.41 | -0.81 | -0.01 |
|                                 | 28 | -0.97 | -1.47 | -0.48 | -0.67 | -1.05 | -0.28 |
|                                 | 29 | -1.09 | -1.57 | -0.60 | -0.76 | -1.13 | -0.39 |
|                                 | 30 | -0.88 | -1.35 | -0.40 | -0.92 | -1.27 | -0.56 |
|                                 | 31 | -0.75 | -1.21 | -0.28 | -0.98 | -1.33 | -0.63 |
|                                 | 32 | -0.95 | -1.41 | -0.49 | -1.11 | -1.45 | -0.76 |
|                                 | 33 | -0.92 | -1.37 | -0.47 | -1.17 | -1.51 | -0.83 |
|                                 | 34 | -1.17 | -1.62 | -0.73 | -1.18 | -1.52 | -0.85 |
|                                 | 35 | -1.27 | -1.71 | -0.83 | -1.20 | -1.53 | -0.87 |
|                                 | 36 | -1.28 | -1.71 | -0.84 | -1.23 | -1.56 | -0.90 |
|                                 | 37 | -1.44 | -1.87 | -1.01 | -1.25 | -1.57 | -0.93 |
|                                 | 38 | -1.49 | -1.91 | -1.06 | -1.20 | -1.52 | -0.88 |
|                                 | 39 | -1.59 | -2.01 | -1.17 | -1.10 | -1.41 | -0.78 |
|                                 | 40 | -1.63 | -2.05 | -1.22 | -1.05 | -1.36 | -0.74 |
|                                 | 41 | -1.69 | -2.11 | -1.28 | -0.97 | -1.28 | -0.66 |
|                                 | 42 | -1.77 | -2.18 | -1.35 | -0.91 | -1.22 | -0.60 |
|                                 | 43 | -1.73 | -2.14 | -1.32 | -0.82 | -1.13 | -0.52 |
|                                 | 44 | -1.65 | -2.06 | -1.24 | -0.76 | -1.06 | -0.45 |
|                                 | 45 | -1.63 | -2.03 | -1.22 | -0.74 | -1.04 | -0.43 |
|                                 | 46 | -1.51 | -1.92 | -1.11 | -0.73 | -1.03 | -0.42 |
|                                 | 47 | -1.49 | -1.90 | -1.09 | -0.71 | -1.01 | -0.41 |
|                                 | 48 | -1.55 | -1.95 | -1.15 | -0.84 | -1.13 | -0.54 |
|                                 | 49 | -1.93 | -2.58 | -1.27 | -1.37 | -1.82 | -0.92 |
|                                 | 50 | -2.06 | -2.76 | -1.36 | -1.54 | -2.02 | -1.06 |
|                                 | 51 | -1.97 | -2.66 | -1.27 | -1.69 | -2.17 | -1.21 |
|                                 | 52 | -2.06 | -2.72 | -1.39 | -1.90 | -2.36 | -1.44 |
|                                 | 53 | -2.27 | -2.90 | -1.63 | -2.15 | -2.60 | -1.71 |
|                                 | 54 | -2.35 | -2.96 | -1.75 | -2.35 | -2.78 | -1.92 |
|                                 | 55 | -2.24 | -2.83 | -1.64 | -2.32 | -2.74 | -1.89 |
|                                 | 56 | -2.41 | -2.99 | -1.83 | -2.24 | -2.67 | -1.82 |
|                                 | 57 | -2.51 | -3.09 | -1.93 | -2.01 | -2.44 | -1.58 |
|                                 | 58 | -2.62 | -3.21 | -2.03 | -1.87 | -2.31 | -1.43 |
|                                 | 59 | -2.33 | -2.95 | -1.70 | -1.53 | -1.98 | -1.08 |
|                                 | 60 | -2.18 | -2.84 | -1.50 | -1.17 | -1.65 | -0.69 |
|                                 | 61 | -1.88 | -2.61 | -1.14 | -0.75 | -1.26 | -0.24 |
|                                 | 62 | -1.63 | -2.43 | -0.82 | -0.39 | -0.94 | 0.17  |
|                                 | 63 | -1.43 | -2.32 | -0.54 | 0.02  | -0.58 | 0.63  |
|                                 | 64 | -1.16 | -2.15 | -0.17 | 0.18  | -0.49 | 0.84  |
| USA - Black                     | 25 | -2.10 | -2.31 | -1.89 | -3.05 | -3.25 | -2.86 |
|                                 | 26 | -2.14 | -2.33 | -1.95 | -3.25 | -3.42 | -3.08 |
|                                 | 27 | -2.31 | -2.48 | -2.13 | -3.43 | -3.59 | -3.27 |



|                |    |       |       |       |       |       |       |
|----------------|----|-------|-------|-------|-------|-------|-------|
|                | 28 | -2.50 | -2.67 | -2.33 | -3.51 | -3.66 | -3.36 |
|                | 29 | -2.64 | -2.80 | -2.47 | -3.50 | -3.65 | -3.35 |
|                | 30 | -2.75 | -2.91 | -2.59 | -3.41 | -3.56 | -3.27 |
|                | 31 | -2.80 | -2.95 | -2.64 | -3.31 | -3.45 | -3.17 |
|                | 32 | -2.92 | -3.08 | -2.77 | -3.26 | -3.40 | -3.12 |
|                | 33 | -3.01 | -3.17 | -2.86 | -3.14 | -3.28 | -3.00 |
|                | 34 | -3.05 | -3.20 | -2.89 | -2.98 | -3.12 | -2.85 |
|                | 35 | -2.95 | -3.10 | -2.80 | -2.70 | -2.84 | -2.57 |
|                | 36 | -2.92 | -3.07 | -2.77 | -2.46 | -2.59 | -2.33 |
|                | 37 | -2.88 | -3.03 | -2.73 | -2.27 | -2.40 | -2.13 |
|                | 38 | -2.80 | -2.95 | -2.65 | -1.98 | -2.11 | -1.85 |
|                | 39 | -2.65 | -2.79 | -2.50 | -1.79 | -1.92 | -1.66 |
|                | 40 | -2.38 | -2.52 | -2.23 | -1.56 | -1.69 | -1.44 |
|                | 41 | -2.09 | -2.24 | -1.95 | -1.40 | -1.53 | -1.27 |
|                | 42 | -1.96 | -2.10 | -1.81 | -1.39 | -1.51 | -1.26 |
|                | 43 | -1.88 | -2.03 | -1.74 | -1.46 | -1.58 | -1.33 |
|                | 44 | -1.76 | -1.91 | -1.62 | -1.53 | -1.65 | -1.40 |
|                | 45 | -1.57 | -1.71 | -1.43 | -1.50 | -1.62 | -1.37 |
|                | 46 | -1.43 | -1.57 | -1.28 | -1.62 | -1.74 | -1.50 |
|                | 47 | -1.44 | -1.59 | -1.30 | -1.78 | -1.90 | -1.66 |
|                | 48 | -1.51 | -1.66 | -1.37 | -2.01 | -2.14 | -1.89 |
|                | 49 | -1.68 | -1.94 | -1.41 | -2.55 | -2.74 | -2.36 |
|                | 50 | -1.81 | -2.08 | -1.53 | -2.83 | -3.03 | -2.63 |
|                | 51 | -1.90 | -2.16 | -1.63 | -3.09 | -3.28 | -2.89 |
|                | 52 | -2.05 | -2.30 | -1.80 | -3.44 | -3.63 | -3.26 |
|                | 53 | -2.21 | -2.44 | -1.98 | -3.63 | -3.81 | -3.45 |
|                | 54 | -2.34 | -2.56 | -2.12 | -3.76 | -3.94 | -3.59 |
|                | 55 | -2.51 | -2.72 | -2.30 | -3.87 | -4.05 | -3.70 |
|                | 56 | -2.55 | -2.75 | -2.34 | -3.79 | -3.97 | -3.62 |
|                | 57 | -2.60 | -2.81 | -2.39 | -3.85 | -4.02 | -3.67 |
|                | 58 | -2.60 | -2.82 | -2.38 | -3.79 | -3.97 | -3.62 |
|                | 59 | -2.72 | -2.95 | -2.49 | -3.76 | -3.94 | -3.58 |
|                | 60 | -2.67 | -2.93 | -2.42 | -3.62 | -3.81 | -3.43 |
|                | 61 | -2.55 | -2.83 | -2.27 | -3.25 | -3.46 | -3.05 |
|                | 62 | -2.41 | -2.72 | -2.10 | -2.95 | -3.18 | -2.73 |
|                | 63 | -2.25 | -2.60 | -1.91 | -2.52 | -2.77 | -2.28 |
|                | 64 | -2.09 | -2.48 | -1.71 | -2.16 | -2.43 | -1.89 |
| USA - Hispanic | 25 | -0.83 | -1.15 | -0.52 | -2.54 | -2.81 | -2.27 |
|                | 26 | -1.05 | -1.33 | -0.77 | -2.61 | -2.84 | -2.38 |
|                | 27 | -1.04 | -1.30 | -0.79 | -2.78 | -2.99 | -2.57 |
|                | 28 | -1.13 | -1.37 | -0.89 | -3.04 | -3.23 | -2.84 |
|                | 29 | -1.22 | -1.46 | -0.99 | -3.18 | -3.37 | -3.00 |
|                | 30 | -1.22 | -1.45 | -1.00 | -3.10 | -3.28 | -2.93 |
|                | 31 | -1.23 | -1.45 | -1.00 | -3.09 | -3.26 | -2.91 |
|                | 32 | -1.30 | -1.51 | -1.08 | -3.19 | -3.36 | -3.02 |
|                | 33 | -1.43 | -1.65 | -1.22 | -3.23 | -3.40 | -3.07 |
|                | 34 | -1.49 | -1.70 | -1.28 | -3.14 | -3.30 | -2.98 |
|                | 35 | -1.48 | -1.69 | -1.28 | -3.08 | -3.24 | -2.93 |
|                | 36 | -1.45 | -1.66 | -1.25 | -2.92 | -3.08 | -2.77 |
|                | 37 | -1.41 | -1.61 | -1.21 | -2.78 | -2.93 | -2.63 |
|                | 38 | -1.43 | -1.63 | -1.23 | -2.63 | -2.78 | -2.48 |
|                | 39 | -1.49 | -1.69 | -1.30 | -2.42 | -2.56 | -2.27 |
|                | 40 | -1.39 | -1.58 | -1.20 | -2.15 | -2.30 | -2.01 |
|                | 41 | -1.23 | -1.42 | -1.03 | -1.89 | -2.04 | -1.75 |
|                | 42 | -1.10 | -1.29 | -0.91 | -1.68 | -1.82 | -1.54 |
|                | 43 | -1.00 | -1.19 | -0.81 | -1.55 | -1.69 | -1.40 |
|                | 44 | -0.93 | -1.12 | -0.74 | -1.40 | -1.54 | -1.25 |
|                | 45 | -0.82 | -1.01 | -0.63 | -1.24 | -1.38 | -1.10 |
|                | 46 | -0.64 | -0.82 | -0.45 | -1.10 | -1.24 | -0.95 |
|                | 47 | -0.56 | -0.75 | -0.37 | -1.07 | -1.21 | -0.92 |
|                | 48 | -0.49 | -0.68 | -0.31 | -1.12 | -1.26 | -0.97 |
|                | 49 | -0.94 | -1.25 | -0.63 | -1.56 | -1.77 | -1.35 |
|                | 50 | -1.54 | -1.85 | -1.23 | -1.79 | -2.01 | -1.57 |
|                | 51 | -1.94 | -2.24 | -1.63 | -1.90 | -2.12 | -1.67 |
|                | 52 | -2.26 | -2.55 | -1.96 | -2.10 | -2.31 | -1.89 |
|                | 53 | -2.38 | -2.66 | -2.10 | -2.27 | -2.48 | -2.06 |
|                | 54 | -2.53 | -2.80 | -2.26 | -2.44 | -2.64 | -2.23 |
|                | 55 | -2.65 | -2.91 | -2.38 | -2.60 | -2.81 | -2.40 |
|                | 56 | -2.56 | -2.83 | -2.30 | -2.66 | -2.86 | -2.46 |
|                | 57 | -2.45 | -2.72 | -2.18 | -2.80 | -3.00 | -2.61 |

|             |    |       |       |       |       |       |       |
|-------------|----|-------|-------|-------|-------|-------|-------|
|             | 58 | -2.29 | -2.56 | -2.01 | -2.86 | -3.05 | -2.66 |
|             | 59 | -2.07 | -2.35 | -1.78 | -2.91 | -3.11 | -2.71 |
|             | 60 | -1.79 | -2.09 | -1.49 | -2.79 | -3.00 | -2.58 |
|             | 61 | -1.37 | -1.70 | -1.05 | -2.57 | -2.79 | -2.35 |
|             | 62 | -0.90 | -1.26 | -0.55 | -2.31 | -2.55 | -2.07 |
|             | 63 | -0.31 | -0.70 | 0.08  | -2.02 | -2.28 | -1.75 |
|             | 64 | 0.19  | -0.24 | 0.63  | -1.69 | -1.98 | -1.41 |
| USA - White | 25 | 2.95  | 2.83  | 3.08  | 1.86  | 1.75  | 1.97  |
|             | 26 | 2.92  | 2.80  | 3.04  | 1.61  | 1.51  | 1.71  |
|             | 27 | 2.81  | 2.70  | 2.93  | 1.33  | 1.23  | 1.42  |
|             | 28 | 2.66  | 2.55  | 2.77  | 1.03  | 0.94  | 1.13  |
|             | 29 | 2.47  | 2.36  | 2.57  | 0.77  | 0.68  | 0.86  |
|             | 30 | 2.25  | 2.15  | 2.36  | 0.57  | 0.49  | 0.66  |
|             | 31 | 1.97  | 1.86  | 2.07  | 0.34  | 0.25  | 0.43  |
|             | 32 | 1.68  | 1.57  | 1.78  | 0.12  | 0.04  | 0.21  |
|             | 33 | 1.37  | 1.27  | 1.47  | -0.05 | -0.13 | 0.04  |
|             | 34 | 1.07  | 0.97  | 1.17  | -0.17 | -0.25 | -0.08 |
|             | 35 | 0.81  | 0.71  | 0.91  | -0.22 | -0.31 | -0.14 |
|             | 36 | 0.57  | 0.47  | 0.67  | -0.24 | -0.32 | -0.15 |
|             | 37 | 0.26  | 0.16  | 0.36  | -0.33 | -0.41 | -0.25 |
|             | 38 | 0.16  | 0.06  | 0.26  | -0.21 | -0.29 | -0.13 |
|             | 39 | 0.09  | -0.01 | 0.19  | -0.10 | -0.18 | -0.02 |
|             | 40 | 0.10  | 0.01  | 0.20  | 0.10  | 0.02  | 0.18  |
|             | 41 | 0.18  | 0.09  | 0.28  | 0.29  | 0.21  | 0.37  |
|             | 42 | 0.32  | 0.22  | 0.41  | 0.45  | 0.38  | 0.53  |
|             | 43 | 0.45  | 0.36  | 0.55  | 0.61  | 0.53  | 0.69  |
|             | 44 | 0.59  | 0.49  | 0.68  | 0.73  | 0.65  | 0.81  |
|             | 45 | 0.78  | 0.68  | 0.87  | 0.88  | 0.80  | 0.96  |
|             | 46 | 0.93  | 0.84  | 1.03  | 0.94  | 0.86  | 1.02  |
|             | 47 | 0.95  | 0.86  | 1.04  | 0.90  | 0.82  | 0.98  |
|             | 48 | 0.91  | 0.81  | 1.00  | 0.81  | 0.73  | 0.89  |
|             | 49 | 0.62  | 0.44  | 0.79  | 0.44  | 0.31  | 0.57  |
|             | 50 | 0.30  | 0.13  | 0.48  | 0.01  | -0.12 | 0.15  |
|             | 51 | 0.04  | -0.12 | 0.21  | -0.33 | -0.46 | -0.20 |
|             | 52 | -0.29 | -0.45 | -0.13 | -0.72 | -0.84 | -0.59 |
|             | 53 | -0.55 | -0.70 | -0.40 | -1.01 | -1.13 | -0.90 |
|             | 54 | -0.71 | -0.85 | -0.57 | -1.32 | -1.43 | -1.21 |
|             | 55 | -0.78 | -0.92 | -0.65 | -1.56 | -1.67 | -1.45 |
|             | 56 | -0.81 | -0.95 | -0.68 | -1.63 | -1.74 | -1.53 |
|             | 57 | -0.84 | -0.98 | -0.70 | -1.66 | -1.77 | -1.55 |
|             | 58 | -0.71 | -0.85 | -0.56 | -1.57 | -1.68 | -1.46 |
|             | 59 | -0.56 | -0.72 | -0.41 | -1.41 | -1.53 | -1.29 |
|             | 60 | -0.32 | -0.48 | -0.15 | -1.12 | -1.25 | -0.99 |
|             | 61 | 0.05  | -0.13 | 0.24  | -0.64 | -0.78 | -0.50 |
|             | 62 | 0.46  | 0.25  | 0.66  | -0.14 | -0.30 | 0.01  |
|             | 63 | 0.94  | 0.71  | 1.17  | 0.42  | 0.25  | 0.59  |
|             | 64 | 1.32  | 1.07  | 1.58  | 0.98  | 0.79  | 1.16  |

**Table S3. Age-adjusted mortality rates in U.S. men and women by race/ethnicity, age group and calendar period, 1999-2014.**

| <i>Age, years</i> | <i>Calendar period</i> | <i>Men</i>    |             | <i>Women</i>  |             |
|-------------------|------------------------|---------------|-------------|---------------|-------------|
|                   |                        | <i>Deaths</i> | <i>Rate</i> | <i>Deaths</i> | <i>Rate</i> |
| <b>White</b>      |                        |               |             |               |             |
| 25-39             | 1999-2002              | 124,802       | 151.8       | 62,145        | 76.1        |
|                   | 2003-2006              | 117,160       | 155.9       | 58,507        | 78.8        |
|                   | 2007-2010              | 116,008       | 159.1       | 57,871        | 81.2        |
|                   | 2011-2014              | 119,320       | 165.5       | 60,360        | 86.5        |
|                   | Rate Ratio*            |               | 1.09        |               | 1.14        |
| 40-49             | 1999-2002              | 217,436       | 343.6       | 121,853       | 191.2       |
|                   | 2003-2006              | 224,258       | 349.4       | 131,652       | 203.6       |
|                   | 2007-2010              | 203,692       | 334.8       | 125,337       | 205.0       |
|                   | 2011-2014              | 177,779       | 321.4       | 113,601       | 205.2       |
|                   | Rate Ratio*            |               | 0.94        |               | 1.07        |
| 50-64             | 1999-2002              | 603,917       | 919.3       | 393,672       | 569.8       |
|                   | 2003-2006              | 668,658       | 886.8       | 429,116       | 543.3       |
|                   | 2007-2010              | 733,347       | 863.2       | 461,701       | 520.9       |
|                   | 2011-2014              | 790,656       | 871.8       | 498,261       | 527.7       |
|                   | Rate Ratio*            |               | 0.95        |               | 0.93        |
| <b>Hispanic</b>   |                        |               |             |               |             |
| 25-39             | 1999-2002              | 27,521        | 139.7       | 9,781         | 57.1        |
|                   | 2003-2006              | 29,805        | 133.3       | 10,259        | 52.0        |
|                   | 2007-2010              | 29,111        | 118.0       | 10,901        | 48.8        |
|                   | 2011-2014              | 28,605        | 109.0       | 11,412        | 47.8        |
|                   | Rate Ratio*            |               | 0.78        |               | 0.84        |
| 40-49             | 1999-2002              | 26,319        | 309.6       | 12,370        | 148.7       |
|                   | 2003-2006              | 30,166        | 285.2       | 14,382        | 139.8       |
|                   | 2007-2010              | 30,616        | 244.3       | 15,418        | 126.9       |
|                   | 2011-2014              | 30,752        | 216.5       | 16,283        | 118.4       |
|                   | Rate Ratio*            |               | 0.70        |               | 0.80        |
| 50-64             | 1999-2002              | 46,619        | 775.2       | 28,643        | 432.2       |
|                   | 2003-2006              | 57,138        | 739.9       | 34,003        | 404.6       |
|                   | 2007-2010              | 67,809        | 680.0       | 39,730        | 370.1       |
|                   | 2011-2014              | 81,513        | 650.3       | 47,055        | 353.5       |
|                   | Rate Ratio*            |               | 0.84        |               | 0.82        |
| <b>Black</b>      |                        |               |             |               |             |
| 25-39             | 1999-2002              | 46,469        | 311.5       | 26,693        | 160.8       |
|                   | 2003-2006              | 43,834        | 301.4       | 24,150        | 149.7       |
|                   | 2007-2010              | 39,721        | 266.1       | 21,395        | 131.0       |

|                                       |             |         |       |         |       |
|---------------------------------------|-------------|---------|-------|---------|-------|
|                                       | 2011-2014   | 38,847  | 249.1 | 20,431  | 122.9 |
|                                       | Rate Ratio* |         | 0.80  |         | 0.76  |
| 40-49                                 | 1999-2002   | 65,378  | 691.0 | 45,198  | 417.3 |
|                                       | 2003-2006   | 63,722  | 614.3 | 46,326  | 394.3 |
|                                       | 2007-2010   | 53,699  | 508.3 | 40,658  | 341.7 |
|                                       | 2011-2014   | 46,467  | 450.6 | 35,189  | 303.3 |
|                                       | Rate Ratio* |         | 0.65  |         | 0.73  |
| 50-64                                 | 1999-2002   | 133,803 | 1728  | 95,790  | 1,014 |
|                                       | 2003-2006   | 151,680 | 1624  | 106,414 | 946.8 |
|                                       | 2007-2010   | 164,009 | 1444  | 115,662 | 857.6 |
|                                       | 2011-2014   | 176,472 | 1335  | 127,287 | 814.8 |
|                                       | Rate Ratio* |         | 0.77  |         | 0.80  |
| <b>Asian Pacific/Alaska Natives</b>   |             |         |       |         |       |
| 25-39                                 | 1999-2002   | 4,148   | 68.1  | 2,294   | 35.9  |
|                                       | 2003-2006   | 4,203   | 60.9  | 2,453   | 33.2  |
|                                       | 2007-2010   | 4,428   | 58.6  | 2,669   | 31.9  |
|                                       | 2011-2014   | 4,984   | 60.1  | 2,788   | 30.7  |
|                                       | Rate Ratio* |         | 0.88  |         | 0.86  |
| 40-49                                 | 1999-2002   | 5,382   | 159.8 | 3,742   | 98.3  |
|                                       | 2003-2006   | 5,942   | 151.5 | 4,046   | 92.1  |
|                                       | 2007-2010   | 6,110   | 138.7 | 4,001   | 80.9  |
|                                       | 2011-2014   | 6,843   | 137.6 | 4,496   | 80.1  |
|                                       | Rate Ratio* |         | 0.86  |         | 0.81  |
| 50-64                                 | 1999-2002   | 14,245  | 488.3 | 10,127  | 304.2 |
|                                       | 2003-2006   | 16,589  | 444.4 | 11,853  | 271.7 |
|                                       | 2007-2010   | 19,386  | 414.3 | 13,558  | 242.9 |
|                                       | 2011-2014   | 22,969  | 407.6 | 15,871  | 235.7 |
|                                       | Rate Ratio* |         | 0.83  |         | 0.78  |
| <b>American Indian/Alaska Natives</b> |             |         |       |         |       |
| 25-39                                 | 1999-2002   | 2,304   | 377.2 | 1,160   | 182.2 |
|                                       | 2003-2006   | 2,493   | 419.1 | 1,224   | 200.4 |
|                                       | 2007-2010   | 2,630   | 423.3 | 1,371   | 216.4 |
|                                       | 2011-2014   | 2,935   | 442.7 | 1,585   | 240.0 |
|                                       | Rate Ratio* |         | 1.17  |         | 1.32  |
| 40-49                                 | 1999-2002   | 2,395   | 635.1 | 1,429   | 342.8 |
|                                       | 2003-2006   | 2,862   | 690.7 | 1,819   | 401.7 |
|                                       | 2007-2010   | 3,027   | 722.7 | 1,908   | 422.3 |
|                                       | 2011-2014   | 3,034   | 755.1 | 1,996   | 467.9 |
|                                       | Rate Ratio* |         | 1.19  |         | 1.37  |

|       |             |       |      |       |       |
|-------|-------------|-------|------|-------|-------|
| 50-64 | 1999-2002   | 4,260 | 1317 | 3,078 | 860.8 |
|       | 2003-2006   | 5,182 | 1349 | 3,712 | 867.4 |
|       | 2007-2010   | 6,082 | 1335 | 4,301 | 839.8 |
|       | 2011-2014   | 7,261 | 1409 | 5,055 | 863.1 |
|       | Rate Ratio* |       | 1.07 |       | 1.00  |

---

\*Age-adjusted rate ratio comparing mortality rates in 2011-2014 to 1999-2002.

**Table S4. Age-standardized mortality rates by race/ethnicity, sex, age group, calendar period and cause of death.**

|               |                                                     | 1999-2002 |       | 2011-2014 |       | Absolute change | Rate Ratio |
|---------------|-----------------------------------------------------|-----------|-------|-----------|-------|-----------------|------------|
|               |                                                     | Deaths    | IR    | Deaths    | IR    |                 |            |
| <b>Whites</b> |                                                     |           |       |           |       |                 |            |
| <b>Men</b>    |                                                     |           |       |           |       |                 |            |
| <b>25-39</b>  | All Causes of Death                                 | 124,802   | 151.8 | 119,320   | 165.5 | 13.7            | 1.09       |
|               | Accidents & Adverse Effects                         | 39,272    | 47.9  | 48,252    | 65.6  | 17.7            | 1.37       |
|               | Suicide & Self-Inflicted Injury                     | 20,644    | 25.2  | 22,370    | 30.7  | 5.5             | 1.22       |
|               | Diseases of Heart                                   | 12,709    | 15.4  | 10,534    | 15.3  | -0.1            | 1.00       |
|               | All Malignant Cancers                               | 11,704    | 14.2  | 8,394     | 12.1  | -2.1            | 0.85       |
|               | Homicide & Legal Intervention                       | 5,682     | 6.9   | 4,127     | 5.6   | -1.3            | 0.81       |
|               | Ill-Defined Conditions                              | 4,246     | 5.2   | 2,327     | 3.2   | -2.0            | 0.62       |
|               | Chronic Liver Disease and Cirrhosis                 | 2,283     | 2.8   | 2,092     | 3.1   | 0.3             | 1.12       |
|               | Diabetes Mellitus                                   | 1,926     | 2.3   | 1,743     | 2.5   | 0.2             | 1.08       |
|               | Cerebrovascular Diseases                            | 1,508     | 1.8   | 1,122     | 1.6   | -0.2            | 0.89       |
|               | Pneumonia & Influenza                               | 982       | 1.2   | 1,022     | 1.4   | 0.2             | 1.21       |
|               | Congenital Anomalies                                | 1,192     | 1.5   | 946       | 1.3   | -0.2            | 0.89       |
|               | Septicemia                                          | 680       | 0.8   | 722       | 1.0   | 0.2             | 1.24       |
|               | HIV                                                 | 5,078     | 6.1   | 692       | 1.0   | -5.1            | 0.16       |
|               | COPD                                                | 612       | 0.7   | 583       | 0.8   | 0.1             | 1.10       |
|               | Nephritis, Nephrotic Syndrome & Nephrosis           | 532       | 0.6   | 484       | 0.7   | 0.1             | 1.09       |
|               | Other Infectious & Parasitic Diseases               | 912       | 1.1   | 432       | 0.6   | -0.5            | 0.56       |
|               | Aortic Aneurysm & Dissection                        | 429       | 0.5   | 370       | 0.5   | 0.0             | 1.03       |
|               | In situ, benign or unknown behavior neoplasm        | 464       | 0.6   | 321       | 0.4   | -0.1            | 0.80       |
|               | Hypertension without Heart Disease                  | 163       | 0.2   | 237       | 0.3   | 0.1             | 1.75       |
|               | Other Diseases of Arteries, Arterioles, Capillaries | 115       | 0.1   | 93        | 0.1   | 0.0             | 0.95       |
|               | Stomach & Duodenal Ulcers                           | 92        | 0.1   | 64        | 0.1   | 0.0             | 0.82       |
|               | Atherosclerosis                                     | 44        | 0.1   | 19        | 0.0   | 0.0             | 0.52       |
|               | Perinatal Period                                    | 16        | 0.0   | 12        | 0.0   | 0.0             | 0.79       |
|               | Tuberculosis                                        | 19        | 0.0   | ^         | ^     | n.e.            | n.e.       |
|               | Syphilis                                            | ^         | ^     | ^         | ^     | n.e.            | n.e.       |
|               | Alzheimers (ICD-9 & 10 only)                        | ^         | ^     | ^         | ^     | n.e.            | n.e.       |
|               | Other Cause of Death                                | 13,489    | 16.4  | 12,347    | 17.3  | 0.9             | 1.06       |
|               |                                                     |           |       |           |       |                 |            |
| <b>40-49</b>  | All Causes of Death                                 | 217,436   | 343.6 | 177,779   | 321.4 | -22.2           | 0.94       |
|               | Diseases of Heart                                   | 48,589    | 76.6  | 35,957    | 64.4  | -12.1           | 0.84       |
|               | Accidents & Adverse Effects                         | 33,064    | 52.6  | 34,913    | 64.2  | 11.6            | 1.22       |
|               | All Malignant Cancers                               | 41,320    | 65.0  | 29,008    | 51.6  | -13.4           | 0.79       |
|               | Suicide & Self-Inflicted Injury                     | 17,488    | 27.8  | 19,336    | 35.6  | 7.8             | 1.28       |
|               | Chronic Liver Disease/Cirrhosis                     | 10,947    | 17.3  | 8,757     | 15.7  | -1.6            | 0.91       |
|               | Diabetes Mellitus                                   | 5,069     | 8.0   | 5,015     | 9.0   | 1.0             | 1.13       |
|               | Cerebrovascular Diseases                            | 4,728     | 7.5   | 3,480     | 6.2   | -1.2            | 0.84       |
|               | Homicide & Legal Intervention                       | 3,786     | 6.0   | 2,664     | 4.9   | -1.1            | 0.82       |
|               | Ill-Defined Conditions                              | 5,523     | 8.8   | 2,504     | 4.6   | -4.2            | 0.52       |
|               | COPD                                                | 2,517     | 4.0   | 2,295     | 4.1   | 0.1             | 1.03       |
|               | HIV                                                 | 6,186     | 9.8   | 2,097     | 3.8   | -6.0            | 0.39       |
|               | Pneumonia & Influenza                               | 2,116     | 3.3   | 1,909     | 3.4   | 0.1             | 1.03       |
|               | Other Infectious & Parasitic Diseases               | 4,166     | 6.6   | 1,878     | 3.3   | -3.3            | 0.50       |
|               | Septicemia                                          | 1,706     | 2.7   | 1,673     | 3.0   | 0.3             | 1.12       |
|               | Nephritis, Nephrotic Syndrome & Nephrosis           | 1,308     | 2.1   | 1,224     | 2.2   | 0.1             | 1.06       |
|               | Hypertension without Heart Disease                  | 638       | 1.0   | 946       | 1.7   | 0.7             | 1.68       |
|               | Aortic Aneurysm & Dissection                        | 955       | 1.5   | 827       | 1.5   | 0.0             | 0.99       |
|               | Congenital Anomalies                                | 1,014     | 1.6   | 820       | 1.5   | -0.1            | 0.93       |
|               | In situ, benign or unknown behavior neoplasm        | 814       | 1.3   | 560       | 1.0   | -0.3            | 0.79       |
|               | Other Diseases of Arteries, Arterioles, Capillaries | 338       | 0.5   | 255       | 0.5   | -0.1            | 0.86       |
|               | Stomach & Duodenal Ulcers                           | 338       | 0.5   | 213       | 0.4   | -0.2            | 0.71       |
|               | Atherosclerosis                                     | 191       | 0.3   | 107       | 0.2   | -0.1            | 0.63       |

|              |                                                        |         |       |         |       |       |      |
|--------------|--------------------------------------------------------|---------|-------|---------|-------|-------|------|
|              | Alzheimers (ICD-9 & 10 only)                           | 38      | 0.1   | 35      | 0.1   | 0.0   | 1.03 |
|              | Tuberculosis                                           | 60      | 0.1   | 27      | 0.0   | 0.0   | 0.50 |
|              | Complications of Pregnancy,<br>Childbirth, Puerperium  | 0       | 0.0   | 0       | 0.0   | 0.0   | n.e. |
|              | Syphilis                                               | ^       | ^     | ^       | ^     | n.e.  | n.e. |
|              | Perinatal Period                                       | 11      | 0.0   | ^       | ^     | n.e.  | n.e. |
|              | Other Cause of Death                                   | 24,524  | 38.8  | 21,269  | 38.5  | -0.3  | 0.99 |
|              |                                                        |         |       |         |       |       |      |
|              | All Causes of Death                                    | 603,917 | 919.3 | 790,656 | 871.8 | -47.5 | 0.95 |
| <b>50-64</b> | All Malignant Cancers                                  | 202,059 | 307.6 | 235,777 | 256.0 | -51.6 | 0.83 |
|              | Diseases of Heart                                      | 178,680 | 272.0 | 191,189 | 210.3 | -61.7 | 0.77 |
|              | Accidents & Adverse Effects                            | 27,758  | 42.2  | 55,651  | 64.4  | 22.2  | 1.53 |
|              | Chronic Liver Disease/Cirrhosis                        | 19,055  | 29.0  | 34,524  | 38.9  | 10.0  | 1.34 |
|              | COPD                                                   | 23,014  | 35.1  | 32,499  | 34.7  | -0.4  | 0.99 |
|              | Suicide & Self-Inflicted Injury                        | 15,750  | 23.9  | 31,364  | 36.3  | 12.3  | 1.51 |
|              | Diabetes Mellitus                                      | 18,520  | 28.2  | 26,194  | 28.6  | 0.4   | 1.02 |
|              | Cerebrovascular Diseases                               | 18,135  | 27.6  | 20,371  | 22.2  | -5.4  | 0.80 |
|              | Other Infectious & Parasitic Diseases                  | 5,381   | 8.2   | 12,882  | 14.3  | 6.1   | 1.75 |
|              | Septicemia                                             | 5,603   | 8.5   | 9,658   | 10.6  | 2.0   | 1.24 |
|              | Pneumonia & Influenza                                  | 6,153   | 9.4   | 9,518   | 10.4  | 1.1   | 1.11 |
|              | Nephritis, Nephrotic Syndrome &<br>Nephrosis           | 5,110   | 7.8   | 8,003   | 8.7   | 0.9   | 1.12 |
|              | Ill-Defined Conditions                                 | 6,338   | 9.6   | 7,473   | 8.4   | -1.3  | 0.87 |
|              | Hypertension without Heart Disease                     | 2,377   | 3.6   | 5,950   | 6.5   | 2.9   | 1.80 |
|              | Aortic Aneurysm & Dissection                           | 4,360   | 6.6   | 3,675   | 4.0   | -2.6  | 0.60 |
|              | HIV                                                    | 3,266   | 5.0   | 3,508   | 4.1   | -0.9  | 0.83 |
|              | In situ, benign or unknown behavior<br>neoplasm        | 2,850   | 4.3   | 3,381   | 3.7   | -0.7  | 0.84 |
|              | Homicide & Legal Intervention                          | 2,619   | 4.0   | 3,191   | 3.7   | -0.2  | 0.94 |
|              | Congenital Anomalies                                   | 1,534   | 2.3   | 2,276   | 2.6   | 0.2   | 1.10 |
|              | Other Diseases of Arteries, Arterioles,<br>Capillaries | 1,589   | 2.4   | 1,965   | 2.1   | -0.3  | 0.87 |
|              | Alzheimers (ICD-9 & 10 only)                           | 868     | 1.3   | 1,286   | 1.3   | 0.0   | 1.00 |
|              | Stomach & Duodenal Ulcers                              | 1,063   | 1.6   | 1,125   | 1.2   | -0.4  | 0.76 |
|              | Atherosclerosis                                        | 1,144   | 1.7   | 915     | 1.0   | -0.8  | 0.57 |
|              | Tuberculosis                                           | 183     | 0.3   | 158     | 0.2   | -0.1  | 0.63 |
|              | Syphilis                                               | ^       | ^     | 11      | 0.0   | n.e.  | n.e. |
|              | Complications of Pregnancy,<br>Childbirth, Puerperium  | 0       | 0.0   | 0       | 0.0   | 0.0   | n.e. |
|              | Perinatal Period                                       | ^       | ^     | ^       | ^     | n.e.  | n.e. |
|              | Other Cause of Death                                   | 50,496  | 76.9  | 88,105  | 97.4  | 20.6  | 1.27 |
|              |                                                        |         |       |         |       |       |      |
| <b>Women</b> | All Causes of Death                                    | 62,145  | 76.1  | 60,360  | 86.5  | 10.4  | 1.14 |
| <b>25-39</b> | Accidents & Adverse Effects                            | 13,615  | 16.7  | 19,305  | 27.0  | 10.3  | 1.62 |
|              | All Malignant Cancers                                  | 13,718  | 16.7  | 9,182   | 13.6  | -3.1  | 0.81 |
|              | Suicide & Self-Inflicted Injury                        | 5,110   | 6.3   | 6,208   | 8.8   | 2.5   | 1.40 |
|              | Diseases of Heart                                      | 5,600   | 6.8   | 4,757   | 7.0   | 0.2   | 1.02 |
|              | Homicide & Legal Intervention                          | 2,497   | 3.1   | 1,689   | 2.3   | -0.7  | 0.76 |
|              | Ill-Defined Conditions                                 | 2,153   | 2.6   | 1,468   | 2.1   | -0.6  | 0.79 |
|              | Chronic Liver Disease/Cirrhosis                        | 1,358   | 1.6   | 1,364   | 2.0   | 0.4   | 1.23 |
|              | Diabetes Mellitus                                      | 1,330   | 1.6   | 1,088   | 1.6   | 0.0   | 0.98 |
|              | Cerebrovascular Diseases                               | 1,553   | 1.9   | 983     | 1.4   | -0.5  | 0.76 |
|              | Pneumonia & Influenza                                  | 857     | 1.0   | 892     | 1.3   | 0.2   | 1.22 |
|              | Complications of Pregnancy,<br>Childbirth, Puerperium  | 405     | 0.5   | 790     | 1.1   | 0.6   | 2.19 |
|              | Congenital Anomalies                                   | 942     | 1.2   | 695     | 1.0   | -0.2  | 0.84 |
|              | Septicemia                                             | 605     | 0.7   | 661     | 1.0   | 0.2   | 1.31 |
|              | COPD                                                   | 698     | 0.9   | 574     | 0.8   | 0.0   | 0.99 |
|              | Other Infectious & Parasitic Diseases                  | 552     | 0.7   | 362     | 0.5   | -0.2  | 0.78 |
|              | Nephritis, Nephrotic Syndrome &<br>Nephrosis           | 431     | 0.5   | 357     | 0.5   | 0.0   | 0.99 |
|              | In situ, benign or unknown behavior<br>neoplasm        | 370     | 0.5   | 263     | 0.4   | -0.1  | 0.83 |
|              | HIV                                                    | 1,090   | 1.3   | 235     | 0.3   | -1.0  | 0.26 |
|              | Hypertension without Heart Disease                     | 88      | 0.1   | 116     | 0.2   | 0.1   | 1.60 |
|              | Aortic Aneurysm & Dissection                           | 148     | 0.2   | 107     | 0.2   | 0.0   | 0.86 |

|              |                                                     |         |       |         |       |       |      |
|--------------|-----------------------------------------------------|---------|-------|---------|-------|-------|------|
|              | Other Diseases of Arteries, Arterioles, Capillaries | 132     | 0.2   | 85      | 0.1   | 0.0   | 0.76 |
|              | Stomach & Duodenal Ulcers                           | 44      | 0.1   | 40      | 0.1   | 0.0   | 1.11 |
|              | Syphilis                                            | ^       | ^     | 0       | 0.0   | 0.0   | n.e. |
|              | Tuberculosis                                        | ^       | ^     | ^       | ^     | n.e.  | n.e. |
|              | Alzheimers (ICD-9 & 10 only)                        | ^       | ^     | ^       | ^     | n.e.  | n.e. |
|              | Atherosclerosis                                     | 22      | 0.0   | ^       | ^     | n.e.  | n.e. |
|              | Perinatal Period                                    | 14      | 0.0   | ^       | ^     | n.e.  | n.e. |
|              | Other Cause of Death                                | 8,802   | 10.8  | 9,113   | 13.1  | 2.3   | 1.21 |
|              |                                                     |         |       |         |       |       |      |
|              | All Causes of Death                                 | 121,853 | 191.2 | 113,601 | 205.2 | 14.0  | 1.07 |
| <b>40-49</b> | All Malignant Cancers                               | 44,608  | 69.8  | 32,833  | 58.7  | -11.0 | 0.84 |
|              | Accidents & Adverse Effects                         | 12,211  | 19.3  | 17,978  | 33.0  | 13.7  | 1.71 |
|              | Diseases of Heart                                   | 15,492  | 24.3  | 14,633  | 26.3  | 2.1   | 1.08 |
|              | Suicide & Self-Inflicted Injury                     | 5,491   | 8.7   | 6,704   | 12.3  | 3.6   | 1.42 |
|              | Chronic Liver Disease/Cirrhosis                     | 4,417   | 6.9   | 5,051   | 9.0   | 2.1   | 1.30 |
|              | Cerebrovascular Diseases                            | 4,287   | 6.7   | 2,977   | 5.3   | -1.4  | 0.80 |
|              | Diabetes Mellitus                                   | 3,092   | 4.8   | 2,922   | 5.3   | 0.4   | 1.09 |
|              | COPD                                                | 2,419   | 3.8   | 2,891   | 5.1   | 1.3   | 1.35 |
|              | Ill-Defined Conditions                              | 2,900   | 4.6   | 1,773   | 3.2   | -1.3  | 0.71 |
|              | Pneumonia & Influenza                               | 1,539   | 2.4   | 1,689   | 3.1   | 0.7   | 1.27 |
|              | Septicemia                                          | 1,429   | 2.2   | 1,622   | 2.9   | 0.7   | 1.31 |
|              | Homicide & Legal Intervention                       | 1,589   | 2.5   | 1,181   | 2.2   | -0.3  | 0.87 |
|              | Other Infectious & Parasitic Diseases               | 1,663   | 2.6   | 1,123   | 2.0   | -0.6  | 0.77 |
|              | Nephritis, Nephrotic Syndrome & Nephrosis           | 925     | 1.5   | 866     | 1.6   | 0.1   | 1.07 |
|              | Congenital Anomalies                                | 880     | 1.4   | 755     | 1.4   | 0.0   | 0.99 |
|              | In situ, benign or unknown behavior neoplasm        | 649     | 1.0   | 470     | 0.8   | -0.2  | 0.83 |
|              | HIV                                                 | 1,017   | 1.6   | 465     | 0.8   | -0.8  | 0.53 |
|              | Hypertension without Heart Disease                  | 331     | 0.5   | 451     | 0.8   | 0.3   | 1.56 |
|              | Complications of Pregnancy, Childbirth, Puerperium  | 64      | 0.1   | 291     | 0.5   | 0.4   | 5.32 |
|              | Aortic Aneurysm & Dissection                        | 277     | 0.4   | 226     | 0.4   | 0.0   | 0.93 |
|              | Other Diseases of Arteries, Arterioles, Capillaries | 300     | 0.5   | 223     | 0.4   | -0.1  | 0.85 |
|              | Stomach & Duodenal Ulcers                           | 202     | 0.3   | 146     | 0.3   | -0.1  | 0.83 |
|              | Atherosclerosis                                     | 77      | 0.1   | 53      | 0.1   | 0.0   | 0.78 |
|              | Alzheimers (ICD-9 & 10 only)                        | 30      | 0.0   | 44      | 0.1   | 0.0   | 1.68 |
|              | Tuberculosis                                        | 18      | 0.0   | 12      | 0.0   | 0.0   | 0.80 |
|              | Syphilis                                            | ^       | ^     | 0       | 0.0   | n.e.  | n.e. |
|              | Perinatal Period                                    | ^       | ^     | ^       | ^     | n.e.  | n.e. |
|              | Other Cause of Death                                | 15,941  | 25.0  | 16,216  | 29.4  | 4.3   | 1.17 |
|              |                                                     |         |       |         |       |       |      |
|              | All Causes of Death                                 | 393,672 | 569.8 | 498,261 | 527.7 | -42.0 | 0.93 |
| <b>50-64</b> | All Malignant Cancers                               | 174,141 | 252.1 | 193,890 | 204.0 | -48.1 | 0.81 |
|              | Diseases of Heart                                   | 72,253  | 104.4 | 75,972  | 79.9  | -24.5 | 0.77 |
|              | COPD                                                | 22,226  | 32.0  | 31,357  | 32.4  | 0.4   | 1.01 |
|              | Accidents & Adverse Effects                         | 12,248  | 17.8  | 27,969  | 31.5  | 13.6  | 1.76 |
|              | Chronic Liver Disease/Cirrhosis                     | 7,728   | 11.2  | 15,511  | 17.0  | 5.8   | 1.52 |
|              | Diabetes Mellitus                                   | 13,422  | 19.4  | 15,333  | 16.0  | -3.4  | 0.83 |
|              | Cerebrovascular Diseases                            | 15,015  | 21.7  | 15,286  | 16.1  | -5.7  | 0.74 |
|              | Suicide & Self-Inflicted Injury                     | 4,818   | 7.0   | 10,336  | 11.7  | 4.6   | 1.66 |
|              | Septicemia                                          | 5,076   | 7.3   | 8,348   | 8.8   | 1.4   | 1.19 |
|              | Pneumonia & Influenza                               | 4,582   | 6.6   | 7,132   | 7.5   | 0.9   | 1.14 |
|              | Other Infectious & Parasitic Diseases               | 2,860   | 4.2   | 6,376   | 6.8   | 2.7   | 1.64 |
|              | Nephritis, Nephrotic Syndrome & Nephrosis           | 4,152   | 6.0   | 5,743   | 5.9   | -0.1  | 0.99 |
|              | Ill-Defined Conditions                              | 3,577   | 5.2   | 4,716   | 5.1   | -0.1  | 0.98 |
|              | Hypertension without Heart Disease                  | 1,588   | 2.3   | 3,183   | 3.3   | 1.0   | 1.45 |
|              | In situ, benign or unknown behavior neoplasm        | 2,237   | 3.2   | 2,473   | 2.6   | -0.6  | 0.80 |
|              | Congenital Anomalies                                | 1,527   | 2.2   | 2,001   | 2.2   | 0.0   | 0.98 |
|              | Alzheimers (ICD-9 & 10 only)                        | 1,047   | 1.5   | 1,738   | 1.7   | 0.2   | 1.14 |
|              | Homicide & Legal Intervention                       | 1,125   | 1.6   | 1,422   | 1.6   | 0.0   | 0.98 |
|              | Other Diseases of Arteries, Arterioles, Capillaries | 1,301   | 1.9   | 1,274   | 1.3   | -0.6  | 0.71 |



|                  |                                                        |         |       |         |       |       |      |
|------------------|--------------------------------------------------------|---------|-------|---------|-------|-------|------|
|                  | Aortic Aneurysm & Dissection                           | 1,339   | 1.9   | 1,175   | 1.2   | -0.7  | 0.63 |
|                  | Stomach & Duodenal Ulcers                              | 627     | 0.9   | 695     | 0.7   | -0.2  | 0.82 |
|                  | HIV                                                    | 404     | 0.6   | 658     | 0.7   | 0.2   | 1.26 |
|                  | Atherosclerosis                                        | 643     | 0.9   | 488     | 0.5   | -0.4  | 0.54 |
|                  | Complications of Pregnancy,<br>Childbirth, Puerperium  | ^       | ^     | 222     | 0.3   | n.e.  | n.e. |
|                  | Tuberculosis                                           | 52      | 0.1   | 65      | 0.1   | 0.0   | 0.91 |
|                  | Syphilis                                               | ^       | ^     | ^       | ^     | n.e.  | n.e. |
|                  | Perinatal Period                                       | ^       | ^     | ^       | ^     | n.e.  | n.e. |
|                  | Other Cause of Death                                   | 39,675  | 57.5  | 64,884  | 68.7  | 11.2  | 1.20 |
|                  | All Causes of Death                                    | 124,802 | 151.8 | 119,320 | 165.5 | 13.7  | 1.09 |
|                  |                                                        |         |       |         |       |       |      |
|                  |                                                        |         |       |         |       |       |      |
| <b>Hispanics</b> |                                                        |         |       |         |       |       |      |
| <b>Men</b>       |                                                        |         |       |         |       |       |      |
| <b>25-39</b>     | All Causes of Death                                    | 27,521  | 139.7 | 28,605  | 109.0 | -30.7 | 0.78 |
|                  | Accidents & Adverse Effects                            | 9,170   | 45.2  | 10,051  | 37.6  | -7.6  | 0.83 |
|                  | Homicide & Legal Intervention                          | 3,971   | 18.8  | 3,582   | 13.2  | -5.7  | 0.70 |
|                  | Suicide & Self-Inflicted Injury                        | 2,313   | 11.5  | 3,206   | 12.0  | 0.5   | 1.05 |
|                  | All Malignant Cancers                                  | 1,784   | 9.4   | 2,354   | 9.2   | -0.2  | 0.98 |
|                  | Diseases of Heart                                      | 1,762   | 9.4   | 2,206   | 8.8   | -0.6  | 0.93 |
|                  | Chronic Liver Disease/Cirrhosis                        | 838     | 4.8   | 918     | 3.8   | -1.0  | 0.79 |
|                  | HIV                                                    | 2,212   | 12.1  | 618     | 2.4   | -9.6  | 0.20 |
|                  | Ill-Defined Conditions                                 | 1,023   | 5.2   | 541     | 2.0   | -3.2  | 0.39 |
|                  | Cerebrovascular Diseases                               | 465     | 2.5   | 518     | 2.1   | -0.4  | 0.84 |
|                  | Diabetes Mellitus                                      | 271     | 1.5   | 434     | 1.7   | 0.3   | 1.20 |
|                  | Pneumonia & Influenza                                  | 180     | 1.0   | 319     | 1.2   | 0.3   | 1.28 |
|                  | Septicemia                                             | 148     | 0.8   | 209     | 0.8   | 0.0   | 1.04 |
|                  | Congenital Anomalies                                   | 159     | 0.8   | 196     | 0.7   | 0.0   | 0.95 |
|                  | Other Infectious & Parasitic Diseases                  | 328     | 1.8   | 178     | 0.7   | -1.1  | 0.40 |
|                  | Nephritis, Nephrotic Syndrome &<br>Nephrosis           | 90      | 0.5   | 136     | 0.5   | 0.1   | 1.13 |
|                  | COPD                                                   | 106     | 0.6   | 120     | 0.5   | -0.1  | 0.83 |
|                  | Aortic Aneurysm & Dissection                           | 68      | 0.4   | 119     | 0.5   | 0.1   | 1.35 |
|                  | In situ, benign or unknown behavior<br>neoplasm        | 67      | 0.3   | 80      | 0.3   | 0.0   | 0.90 |
|                  | Hypertension without Heart Disease                     | 46      | 0.2   | 64      | 0.3   | 0.0   | 1.04 |
|                  | Other Diseases of Arteries, Arterioles,<br>Capillaries | 11      | 0.1   | 26      | 0.1   | 0.0   | 1.76 |
|                  | Tuberculosis                                           | 29      | 0.1   | 25      | 0.1   | -0.1  | 0.65 |
|                  | Stomach & Duodenal Ulcers                              | 11      | 0.1   | 14      | 0.1   | 0.0   | 1.01 |
|                  | Syphilis                                               | 0       | 0.0   | 0       | 0.0   | 0.0   | n.e. |
|                  | Complications of Pregnancy,<br>Childbirth, Puerperium  | 0       | 0.0   | 0       | 0.0   | 0.0   | n.e. |
|                  | Perinatal Period                                       | ^       | ^     | 0       | 0.0   | n.e.  | n.e. |
|                  | Alzheimers (ICD-9 & 10 only)                           | 0       | 0.0   | ^       | ^     | n.e.  | n.e. |
|                  | Atherosclerosis                                        | ^       | ^     | ^       | ^     | n.e.  | n.e. |
|                  | Other Cause of Death                                   | 2,465   | 12.9  | 2,686   | 10.4  | -2.5  | 0.81 |
|                  |                                                        |         |       |         |       |       |      |
| <b>40-49</b>     | All Causes of Death                                    | 26,319  | 309.6 | 30,752  | 216.5 | -93.1 | 0.70 |
|                  | Accidents & Adverse Effects                            | 4,542   | 52.5  | 5,755   | 40.5  | -12.0 | 0.77 |
|                  | Diseases of Heart                                      | 3,692   | 44.0  | 4,907   | 34.6  | -9.4  | 0.79 |
|                  | All Malignant Cancers                                  | 3,598   | 42.9  | 4,590   | 32.3  | -10.6 | 0.75 |
|                  | Chronic Liver Disease/Cirrhosis                        | 2,609   | 30.9  | 2,776   | 19.6  | -11.4 | 0.63 |
|                  | Suicide & Self-Inflicted Injury                        | 1,020   | 11.8  | 1,592   | 11.2  | -0.6  | 0.95 |
|                  | Cerebrovascular Diseases                               | 969     | 11.5  | 1,182   | 8.3   | -3.2  | 0.72 |
|                  | Homicide & Legal Intervention                          | 1,107   | 12.7  | 1,146   | 8.1   | -4.7  | 0.63 |
|                  | Diabetes Mellitus                                      | 721     | 8.6   | 1,128   | 7.9   | -0.7  | 0.92 |
|                  | HIV                                                    | 2,232   | 25.9  | 889     | 6.3   | -19.6 | 0.24 |
|                  | Other Infectious & Parasitic Diseases                  | 831     | 9.9   | 697     | 4.9   | -5.0  | 0.50 |
|                  | Pneumonia & Influenza                                  | 273     | 3.2   | 443     | 3.1   | -0.1  | 0.96 |
|                  | Ill-Defined Conditions                                 | 682     | 8.0   | 413     | 2.9   | -5.1  | 0.36 |
|                  | Septicemia                                             | 249     | 2.9   | 368     | 2.6   | -0.3  | 0.88 |
|                  | Nephritis, Nephrotic Syndrome &<br>Nephrosis           | 222     | 2.6   | 352     | 2.5   | -0.1  | 0.95 |
|                  | Hypertension without Heart Disease                     | 111     | 1.3   | 210     | 1.5   | 0.2   | 1.12 |
|                  | COPD                                                   | 155     | 1.8   | 174     | 1.2   | -0.6  | 0.67 |
|                  | Aortic Aneurysm & Dissection                           | 90      | 1.1   | 146     | 1.0   | 0.0   | 0.97 |

|              |                                                     |        |       |        |       |        |      |
|--------------|-----------------------------------------------------|--------|-------|--------|-------|--------|------|
|              | Congenital Anomalies                                | 97     | 1.1   | 107    | 0.8   | -0.4   | 0.66 |
|              | In situ, benign or unknown behavior neoplasm        | 98     | 1.1   | 98     | 0.7   | -0.5   | 0.60 |
|              | Other Diseases of Arteries, Arterioles, Capillaries | 39     | 0.4   | 43     | 0.3   | -0.1   | 0.68 |
|              | Stomach & Duodenal Ulcers                           | 31     | 0.4   | 41     | 0.3   | -0.1   | 0.77 |
|              | Tuberculosis                                        | 27     | 0.3   | 27     | 0.2   | -0.1   | 0.60 |
|              | Atherosclerosis                                     | 11     | 0.1   | 16     | 0.1   | 0.0    | 0.84 |
|              | Syphilis                                            | ^      | ^     | 0      | 0.0   | n.e.   | n.e. |
|              | Complications of Pregnancy, Childbirth, Puerperium  | 0      | 0.0   | 0      | 0.0   | 0.0    | n.e. |
|              | Perinatal Period                                    | ^      | ^     | 0      | 0.0   | n.e.   | n.e. |
|              | Alzheimers (ICD-9 & 10 only)                        | ^      | ^     | ^      | ^     | n.e.   | n.e. |
|              | Other Cause of Death                                | 2,906  | 34.2  | 3,644  | 25.7  | -8.5   | 0.75 |
|              |                                                     |        |       |        |       |        |      |
| <b>50-64</b> | All Causes of Death                                 | 46,619 | 775.2 | 81,513 | 650.3 | -124.9 | 0.84 |
|              | All Malignant Cancers                               | 11,720 | 196.6 | 20,888 | 167.6 | -29.0  | 0.85 |
|              | Diseases of Heart                                   | 11,979 | 200.6 | 17,214 | 137.8 | -62.8  | 0.69 |
|              | Chronic Liver Disease/Cirrhosis                     | 3,550  | 58.0  | 7,000  | 55.4  | -2.7   | 0.95 |
|              | Accidents & Adverse Effects                         | 2,792  | 45.2  | 6,035  | 47.4  | 2.2    | 1.05 |
|              | Diabetes Mellitus                                   | 2,720  | 45.8  | 4,449  | 35.6  | -10.2  | 0.78 |
|              | Cerebrovascular Diseases                            | 2,175  | 36.3  | 3,376  | 27.0  | -9.3   | 0.74 |
|              | Other Infectious & Parasitic Diseases               | 1,036  | 16.8  | 2,472  | 19.6  | 2.8    | 1.17 |
|              | Suicide & Self-Inflicted Injury                     | 730    | 11.8  | 1,531  | 12.0  | 0.2    | 1.02 |
|              | Nephritis, Nephrotic Syndrome & Nephrosis           | 692    | 11.6  | 1,403  | 11.2  | -0.4   | 0.97 |
|              | Septicemia                                          | 501    | 8.3   | 1,222  | 9.8   | 1.5    | 1.18 |
|              | Pneumonia & Influenza                               | 591    | 9.9   | 1,212  | 9.7   | -0.2   | 0.98 |
|              | HIV                                                 | 1,163  | 18.5  | 1,206  | 9.4   | -9.1   | 0.51 |
|              | COPD                                                | 722    | 12.3  | 1,194  | 9.6   | -2.7   | 0.78 |
|              | Hypertension without Heart Disease                  | 279    | 4.7   | 765    | 6.1   | 1.4    | 1.30 |
|              | Homicide & Legal Intervention                       | 503    | 8.1   | 713    | 5.6   | -2.5   | 0.69 |
|              | Ill-Defined Conditions                              | 485    | 7.9   | 659    | 5.2   | -2.7   | 0.66 |
|              | In situ, benign or unknown behavior neoplasm        | 177    | 3.0   | 298    | 2.4   | -0.6   | 0.81 |
|              | Aortic Aneurysm & Dissection                        | 231    | 3.9   | 268    | 2.1   | -1.7   | 0.55 |
|              | Congenital Anomalies                                | 94     | 1.5   | 194    | 1.5   | 0.0    | 1.00 |
|              | Other Diseases of Arteries, Arterioles, Capillaries | 99     | 1.7   | 188    | 1.5   | -0.2   | 0.90 |
|              | Alzheimers (ICD-9 & 10 only)                        | 32     | 0.6   | 118    | 1.0   | 0.4    | 1.74 |
|              | Stomach & Duodenal Ulcers                           | 112    | 1.9   | 116    | 0.9   | -1.0   | 0.49 |
|              | Atherosclerosis                                     | 67     | 1.1   | 76     | 0.6   | -0.5   | 0.55 |
|              | Tuberculosis                                        | 59     | 1.0   | 61     | 0.5   | -0.5   | 0.50 |
|              | Complications of Pregnancy, Childbirth, Puerperium  | 0      | 0.0   | 0      | 0.0   | 0.0    | n.e. |
|              | Syphilis                                            | ^      | ^     | ^      | ^     | n.e.   | n.e. |
|              | Perinatal Period                                    | 0      | 0.0   | ^      | ^     | n.e.   | n.e. |
|              | Other Cause of Death                                | 4,108  | 68.0  | 8,849  | 70.5  | 2.5    | 1.04 |
|              |                                                     |        |       |        |       |        |      |
| <b>Women</b> | All Causes of Death                                 | 9,781  | 57.1  | 11,412 | 47.8  | -9.2   | 0.84 |
| <b>25-39</b> | All Malignant Cancers                               | 2,188  | 13.2  | 2,695  | 11.6  | -1.6   | 0.88 |
|              | Accidents & Adverse Effects                         | 1,901  | 10.8  | 2,531  | 10.3  | -0.4   | 0.96 |
|              | Diseases of Heart                                   | 658    | 3.9   | 738    | 3.2   | -0.8   | 0.80 |
|              | Suicide & Self-Inflicted Injury                     | 372    | 2.1   | 662    | 2.7   | 0.6    | 1.27 |
|              | Homicide and Legal Intervention                     | 714    | 4.0   | 622    | 2.5   | -1.5   | 0.64 |
|              | Cerebrovascular Diseases                            | 317    | 1.9   | 314    | 1.3   | -0.5   | 0.71 |
|              | Chronic Liver Disease/Cirrhosis                     | 205    | 1.3   | 278    | 1.2   | -0.1   | 0.93 |
|              | Diabetes Mellitus                                   | 188    | 1.1   | 275    | 1.2   | 0.0    | 1.04 |
|              | Ill-Defined Conditions                              | 323    | 1.9   | 261    | 1.1   | -0.8   | 0.58 |
|              | Complications of Pregnancy, Childbirth, Puerperium  | 184    | 1.0   | 250    | 1.0   | 0.0    | 1.00 |
|              | Pneumonia & Influenza                               | 106    | 0.6   | 187    | 0.8   | 0.2    | 1.26 |
|              | Septicemia                                          | 83     | 0.5   | 157    | 0.7   | 0.2    | 1.36 |
|              | HIV                                                 | 634    | 3.8   | 156    | 0.7   | -3.1   | 0.18 |
|              | Congenital Anomalies                                | 120    | 0.7   | 132    | 0.5   | -0.1   | 0.80 |
|              | COPD                                                | 103    | 0.6   | 97     | 0.4   | -0.2   | 0.65 |

|              |                                                     |        |       |        |       |       |      |
|--------------|-----------------------------------------------------|--------|-------|--------|-------|-------|------|
|              | Nephritis, Nephrotic Syndrome & Nephrosis           | 104    | 0.6   | 93     | 0.4   | -0.2  | 0.66 |
|              | Other Infectious & Parasitic Diseases               | 148    | 0.9   | 88     | 0.4   | -0.5  | 0.44 |
|              | In situ, benign or unknown behavior neoplasm        | 67     | 0.4   | 76     | 0.3   | -0.1  | 0.83 |
|              | Hypertension without Heart Disease                  | 19     | 0.1   | 39     | 0.2   | 0.1   | 1.52 |
|              | Other Diseases of Arteries, Arterioles, Capillaries | 35     | 0.2   | 29     | 0.1   | -0.1  | 0.62 |
|              | Aortic Aneurysm & Dissection                        | 20     | 0.1   | 22     | 0.1   | 0.0   | 0.77 |
|              | Syphilis                                            | 0      | 0.0   | 0      | 0.0   | 0.0   | n.e. |
|              | Perinatal Period                                    | ^      | ^     | 0      | 0.0   | n.e.  | n.e. |
|              | Tuberculosis                                        | 11     | 0.1   | ^      | ^     | n.e.  | n.e. |
|              | Alzheimers (ICD-9 & 10 only)                        | 0      | 0.0   | ^      | ^     | n.e.  | n.e. |
|              | Atherosclerosis                                     | ^      | ^     | ^      | ^     | n.e.  | n.e. |
|              | Stomach & Duodenal Ulcers                           | ^      | ^     | ^      | ^     | n.e.  | n.e. |
|              | Other Cause of Death                                | 1,267  | 7.3   | 1,698  | 7.1   | -0.2  | 0.97 |
|              |                                                     |        |       |        |       |       |      |
| <b>40-49</b> | All Causes of Death                                 | 12,370 | 148.7 | 16,283 | 118.4 | -30.3 | 0.80 |
|              | All Malignant Cancers                               | 4,222  | 50.9  | 5,762  | 41.9  | -9.0  | 0.82 |
|              | Accidents & Adverse Effects                         | 1,144  | 13.6  | 1,754  | 12.8  | -0.9  | 0.94 |
|              | Diseases of Heart                                   | 1,224  | 14.8  | 1,654  | 12.0  | -2.8  | 0.81 |
|              | Chronic Liver Disease/Cirrhosis                     | 559    | 6.7   | 838    | 6.1   | -0.6  | 0.91 |
|              | Cerebrovascular Diseases                            | 672    | 8.1   | 744    | 5.4   | -2.7  | 0.67 |
|              | Diabetes Mellitus                                   | 478    | 5.8   | 592    | 4.3   | -1.5  | 0.74 |
|              | Suicide & Self-Inflicted Injury                     | 211    | 2.5   | 432    | 3.1   | 0.6   | 1.25 |
|              | Homicide & Legal Intervention                       | 286    | 3.4   | 279    | 2.0   | -1.4  | 0.60 |
|              | HIV                                                 | 656    | 7.8   | 265    | 1.9   | -5.9  | 0.25 |
|              | Septicemia                                          | 142    | 1.7   | 254    | 1.8   | 0.1   | 1.08 |
|              | Pneumonia & Influenza                               | 104    | 1.3   | 250    | 1.8   | 0.6   | 1.45 |
|              | Other Infectious & Parasitic Diseases               | 295    | 3.6   | 249    | 1.8   | -1.8  | 0.51 |
|              | Nephritis, Nephrotic Syndrome & Nephrosis           | 146    | 1.8   | 214    | 1.6   | -0.2  | 0.88 |
|              | Ill-Defined Conditions                              | 245    | 2.9   | 194    | 1.4   | -1.5  | 0.48 |
|              | COPD                                                | 190    | 2.3   | 154    | 1.1   | -1.2  | 0.49 |
|              | Hypertension without Heart Disease                  | 45     | 0.5   | 99     | 0.7   | 0.2   | 1.33 |
|              | In situ, benign or unknown behavior neoplasm        | 81     | 1.0   | 86     | 0.6   | -0.3  | 0.65 |
|              | Complications of Pregnancy, Childbirth, Puerperium  | 22     | 0.3   | 84     | 0.6   | 0.4   | 2.43 |
|              | Congenital Anomalies                                | 72     | 0.9   | 69     | 0.5   | -0.4  | 0.58 |
|              | Other Diseases of Arteries, Arterioles, Capillaries | 37     | 0.4   | 46     | 0.3   | -0.1  | 0.75 |
|              | Aortic Aneurysm & Dissection                        | 23     | 0.3   | 20     | 0.1   | -0.1  | 0.53 |
|              | Tuberculosis                                        | 10     | 0.1   | 10     | 0.1   | 0.0   | 0.61 |
|              | Stomach & Duodenal Ulcers                           | 10     | 0.1   | 10     | 0.1   | 0.0   | 0.60 |
|              | Syphilis                                            | ^      | ^     | 0      | 0.0   | n.e.  | n.e. |
|              | Perinatal Period                                    | ^      | ^     | 0      | 0.0   | n.e.  | n.e. |
|              | Alzheimers (ICD-9 & 10 only)                        | ^      | ^     | ^      | ^     | n.e.  | n.e. |
|              | Atherosclerosis                                     | ^      | ^     | ^      | ^     | n.e.  | n.e. |
|              | Other Cause of Death                                | 1,486  | 17.9  | 2,209  | 16.1  | -1.8  | 0.90 |
|              |                                                     |        |       |        |       |       |      |
| <b>50-64</b> | All Causes of Death                                 | 28,643 | 432.2 | 47,055 | 353.5 | -78.7 | 0.82 |
|              | All Malignant Cancers                               | 10,274 | 154.8 | 17,544 | 131.8 | -23.0 | 0.85 |
|              | Diseases of Heart                                   | 5,399  | 81.9  | 6,953  | 52.3  | -29.6 | 0.64 |
|              | Diabetes Mellitus                                   | 2,277  | 34.6  | 2,876  | 21.6  | -13.0 | 0.63 |
|              | Chronic Liver Disease/Cirrhosis                     | 1,029  | 15.5  | 2,251  | 16.9  | 1.4   | 1.09 |
|              | Cerebrovascular Diseases                            | 1,543  | 23.3  | 2,090  | 15.7  | -7.6  | 0.67 |
|              | Accidents & Adverse Effects                         | 1,021  | 15.3  | 2,087  | 15.7  | 0.4   | 1.03 |
|              | Other Infectious & Parasitic Diseases               | 523    | 7.9   | 1,082  | 8.1   | 0.3   | 1.03 |
|              | Nephritis, Nephrotic Syndrome & Nephrosis           | 576    | 8.7   | 983    | 7.4   | -1.3  | 0.85 |
|              | COPD                                                | 570    | 8.6   | 922    | 6.9   | -1.7  | 0.80 |
|              | Septicemia                                          | 362    | 5.5   | 896    | 6.7   | 1.3   | 1.23 |
|              | Pneumonia & Influenza                               | 380    | 5.8   | 783    | 5.9   | 0.1   | 1.02 |
|              | Hypertension without Heart Disease                  | 244    | 3.7   | 430    | 3.2   | -0.5  | 0.87 |
|              | Suicide & Self-Inflicted Injury                     | 152    | 2.2   | 405    | 3.0   | 0.8   | 1.35 |
|              | HIV                                                 | 298    | 4.4   | 319    | 2.4   | -2.0  | 0.54 |

|                  |                                                     |        |       |        |       |        |      |
|------------------|-----------------------------------------------------|--------|-------|--------|-------|--------|------|
|                  | Ill-Defined Conditions                              | 239    | 3.6   | 318    | 2.4   | -1.2   | 0.67 |
|                  | In situ, benign or unknown behavior neoplasm        | 162    | 2.4   | 227    | 1.7   | -0.7   | 0.70 |
|                  | Homicide & Legal Intervention                       | 149    | 2.2   | 175    | 1.3   | -0.9   | 0.59 |
|                  | Congenital Anomalies                                | 78     | 1.2   | 144    | 1.1   | -0.1   | 0.92 |
|                  | Alzheimers (ICD-9 & 10 only)                        | 48     | 0.7   | 143    | 1.1   | 0.3    | 1.47 |
|                  | Other Diseases of Arteries, Arterioles, Capillaries | 112    | 1.7   | 131    | 1.0   | -0.7   | 0.58 |
|                  | Aortic Aneurysm & Dissection                        | 91     | 1.4   | 79     | 0.6   | -0.8   | 0.43 |
|                  | Stomach & Duodenal Ulcers                           | 33     | 0.5   | 53     | 0.4   | -0.1   | 0.80 |
|                  | Complications of Pregnancy, Childbirth, Puerperium  | 0      | 0.0   | 37     | 0.3   | 0.3    | n.e. |
|                  | Atherosclerosis                                     | 44     | 0.7   | 33     | 0.3   | -0.4   | 0.38 |
|                  | Tuberculosis                                        | 37     | 0.6   | 26     | 0.2   | -0.4   | 0.35 |
|                  | Syphilis                                            | 0      | 0.0   | 0      | 0.0   | 0.0    | n.e. |
|                  | Perinatal Period                                    | 0      | 0.0   | 0      | 0.0   | 0.0    | n.e. |
|                  | Other Cause of Death                                | 3,002  | 45.2  | 6,068  | 45.6  | 0.4    | 1.01 |
|                  |                                                     |        |       |        |       |        |      |
|                  |                                                     |        |       |        |       |        |      |
| <b>Black Men</b> |                                                     |        |       |        |       |        |      |
| <b>25-39</b>     | All Causes of Death                                 | 46,469 | 311.5 | 38,847 | 249.1 | -62.4  | 0.80 |
|                  | Homicide & Legal Intervention                       | 10,259 | 67.1  | 11,171 | 68.1  | 1.0    | 1.01 |
|                  | Accidents & Adverse Effects                         | 8,117  | 54.0  | 7,490  | 47.4  | -6.7   | 0.88 |
|                  | Diseases of Heart                                   | 5,164  | 35.1  | 4,903  | 33.4  | -1.7   | 0.95 |
|                  | Suicide & Self-Inflicted Injury                     | 2,442  | 16.1  | 2,562  | 16.0  | -0.2   | 0.99 |
|                  | All Malignant Cancers                               | 2,576  | 17.5  | 2,090  | 14.0  | -3.5   | 0.80 |
|                  | HIV                                                 | 6,906  | 47.0  | 1,659  | 10.8  | -36.3  | 0.23 |
|                  | Diabetes Mellitus                                   | 856    | 5.8   | 877    | 5.9   | 0.1    | 1.02 |
|                  | Cerebrovascular Diseases                            | 759    | 5.2   | 684    | 4.7   | -0.5   | 0.91 |
|                  | Ill-Defined Conditions                              | 1,209  | 8.1   | 681    | 4.4   | -3.8   | 0.54 |
|                  | COPD                                                | 475    | 3.2   | 410    | 2.7   | -0.5   | 0.84 |
|                  | Nephritis, Nephrotic Syndrome & Nephrosis           | 442    | 3.0   | 396    | 2.7   | -0.3   | 0.90 |
|                  | Pneumonia & Influenza                               | 427    | 2.9   | 331    | 2.2   | -0.7   | 0.75 |
|                  | Septicemia                                          | 397    | 2.7   | 319    | 2.1   | -0.6   | 0.79 |
|                  | Hypertension without Heart Disease                  | 230    | 1.6   | 268    | 1.9   | 0.3    | 1.18 |
|                  | Congenital Anomalies                                | 226    | 1.5   | 210    | 1.3   | -0.2   | 0.89 |
|                  | Chronic Liver Disease/Cirrhosis                     | 395    | 2.7   | 194    | 1.3   | -1.4   | 0.49 |
|                  | Aortic Aneurysm & Dissection                        | 150    | 1.0   | 192    | 1.3   | 0.3    | 1.30 |
|                  | Other Infectious & Parasitic Diseases               | 357    | 2.4   | 189    | 1.2   | -1.2   | 0.51 |
|                  | In situ, benign or unknown behavior neoplasm        | 99     | 0.7   | 84     | 0.5   | -0.1   | 0.81 |
|                  | Other Diseases of Arteries, Arterioles, Capillaries | 40     | 0.3   | 42     | 0.3   | 0.0    | 1.03 |
|                  | Stomach & Duodenal Ulcers                           | 58     | 0.4   | 33     | 0.2   | -0.2   | 0.57 |
|                  | Tuberculosis                                        | 37     | 0.3   | 10     | 0.1   | -0.2   | 0.25 |
|                  | Syphilis                                            | ^      | ^     | 0      | 0.0   | n.e.   | n.e. |
|                  | Perinatal Period                                    | 0      | 0.0   | 0      | 0.0   | 0.0    | n.e. |
|                  | Alzheimers (ICD-9 & 10 only)                        | ^      | ^     | ^      | ^     | n.e.   | n.e. |
|                  | Atherosclerosis                                     | ^      | ^     | ^      | ^     | n.e.   | n.e. |
|                  | Other Cause of Death                                | 4,828  | 32.6  | 4,043  | 26.5  | -6.1   | 0.81 |
|                  |                                                     |        |       |        |       |        |      |
| <b>40-49</b>     | All Causes of Death                                 | 65,378 | 691.0 | 46,467 | 450.6 | -240.5 | 0.65 |
|                  | Diseases of Heart                                   | 13,718 | 145.2 | 11,806 | 114.2 | -31.0  | 0.79 |
|                  | All Malignant Cancers                               | 10,012 | 106.2 | 6,407  | 61.2  | -45.0  | 0.58 |
|                  | Accidents & Adverse Effects                         | 6,856  | 72.3  | 5,426  | 53.1  | -19.1  | 0.74 |
|                  | Homicide & Legal Intervention                       | 3,121  | 32.8  | 3,054  | 30.3  | -2.4   | 0.93 |
|                  | HIV                                                 | 8,414  | 88.6  | 2,489  | 24.2  | -64.4  | 0.27 |
|                  | Diabetes Mellitus                                   | 1,831  | 19.4  | 2,032  | 19.7  | 0.3    | 1.01 |
|                  | Cerebrovascular Diseases                            | 2,656  | 28.1  | 1,994  | 19.2  | -8.9   | 0.68 |
|                  | Suicide & Self-Inflicted Injury                     | 1,082  | 11.4  | 1,222  | 12.1  | 0.7    | 1.06 |
|                  | Nephritis, Nephrotic Syndrome & Nephrosis           | 1,120  | 11.9  | 950    | 9.2   | -2.7   | 0.78 |
|                  | Chronic Liver Disease/Cirrhosis                     | 1,973  | 20.9  | 844    | 8.1   | -12.8  | 0.39 |
|                  | Hypertension without Heart Disease                  | 666    | 7.0   | 758    | 7.3   | 0.3    | 1.04 |
|                  | Septicemia                                          | 858    | 9.1   | 727    | 7.0   | -2.1   | 0.77 |
|                  | Ill-Defined Conditions                              | 1,454  | 15.4  | 660    | 6.4   | -8.9   | 0.42 |

|              |                                                     |         |        |         |        |        |      |
|--------------|-----------------------------------------------------|---------|--------|---------|--------|--------|------|
|              | COPD                                                | 778     | 8.2    | 636     | 6.2    | -2.1   | 0.75 |
|              | Pneumonia & Influenza                               | 907     | 9.6    | 578     | 5.6    | -4.0   | 0.58 |
|              | Other Infectious & Parasitic Diseases               | 1,068   | 11.3   | 422     | 4.0    | -7.3   | 0.36 |
|              | Aortic Aneurysm & Dissection                        | 376     | 4.0    | 380     | 3.7    | -0.2   | 0.94 |
|              | In situ, benign or unknown behavior neoplasm        | 145     | 1.5    | 138     | 1.3    | -0.2   | 0.88 |
|              | Congenital Anomalies                                | 194     | 2.0    | 138     | 1.4    | -0.7   | 0.66 |
|              | Other Diseases of Arteries, Arterioles, Capillaries | 97      | 1.0    | 92      | 0.9    | -0.2   | 0.85 |
|              | Stomach & Duodenal Ulcers                           | 132     | 1.4    | 60      | 0.6    | -0.8   | 0.41 |
|              | Atherosclerosis                                     | 48      | 0.5    | 27      | 0.3    | -0.2   | 0.52 |
|              | Tuberculosis                                        | 95      | 1.0    | 20      | 0.2    | -0.8   | 0.19 |
|              | Complications of Pregnancy, Childbirth, Puerperium  | 0       | 0.0    | 0       | 0.0    | 0.0    | n.e. |
|              | Syphilis                                            | ^       | ^      | ^       | ^      | n.e.   | n.e. |
|              | Alzheimers (ICD-9 & 10 only)                        | ^       | ^      | ^       | ^      | n.e.   | n.e. |
|              | Perinatal Period                                    | ^       | ^      | ^       | ^      | n.e.   | n.e. |
|              | Other Cause of Death                                | 7,770   | 82.1   | 5,596   | 54.3   | -27.9  | 0.66 |
|              |                                                     |         |        |         |        |        |      |
| <b>50-64</b> | All Causes of Death                                 | 133,803 | 1728.4 | 176,472 | 1334.6 | -393.7 | 0.77 |
|              | All Malignant Cancers                               | 37,628  | 488.9  | 47,991  | 361.7  | -127.2 | 0.74 |
|              | Diseases of Heart                                   | 38,742  | 501.9  | 46,733  | 353.5  | -148.4 | 0.70 |
|              | Accidents & Adverse Effects                         | 5,585   | 70.9   | 9,843   | 75.0   | 4.1    | 1.06 |
|              | Cerebrovascular Diseases                            | 7,195   | 93.1   | 8,513   | 64.4   | -28.8  | 0.69 |
|              | Diabetes Mellitus                                   | 5,656   | 73.4   | 8,109   | 61.2   | -12.1  | 0.83 |
|              | HIV                                                 | 4,646   | 58.3   | 4,495   | 34.3   | -23.9  | 0.59 |
|              | Chronic Liver Disease/Cirrhosis                     | 3,141   | 40.0   | 4,468   | 33.8   | -6.2   | 0.85 |
|              | Nephritis, Nephrotic Syndrome & Nephrosis           | 2,852   | 36.9   | 4,320   | 32.6   | -4.3   | 0.88 |
|              | COPD                                                | 3,053   | 39.9   | 4,279   | 32.2   | -7.7   | 0.81 |
|              | Septicemia                                          | 2,291   | 29.7   | 3,250   | 24.6   | -5.1   | 0.83 |
|              | Hypertension without Heart Disease                  | 1,658   | 21.4   | 2,859   | 21.6   | 0.2    | 1.01 |
|              | Other Infectious & Parasitic Diseases               | 1,393   | 17.6   | 2,853   | 21.5   | 3.8    | 1.22 |
|              | Pneumonia & Influenza                               | 1,784   | 23.1   | 2,383   | 18.0   | -5.1   | 0.78 |
|              | Homicide & Legal Intervention                       | 1,443   | 18.2   | 2,213   | 17.0   | -1.1   | 0.94 |
|              | Ill-Defined Conditions                              | 1,719   | 21.9   | 1,756   | 13.3   | -8.6   | 0.61 |
|              | Suicide & Self-Inflicted Injury                     | 700     | 8.9    | 1,227   | 9.4    | 0.5    | 1.06 |
|              | Aortic Aneurysm & Dissection                        | 719     | 9.3    | 737     | 5.6    | -3.7   | 0.60 |
|              | Other Diseases of Arteries, Arterioles, Capillaries | 397     | 5.2    | 550     | 4.1    | -1.0   | 0.80 |
|              | In situ, benign or unknown behavior neoplasm        | 410     | 5.3    | 546     | 4.1    | -1.2   | 0.77 |
|              | Congenital Anomalies                                | 175     | 2.2    | 262     | 2.0    | -0.2   | 0.90 |
|              | Stomach & Duodenal Ulcers                           | 281     | 3.6    | 235     | 1.8    | -1.8   | 0.49 |
|              | Atherosclerosis                                     | 244     | 3.2    | 186     | 1.4    | -1.8   | 0.44 |
|              | Alzheimers (ICD-9 & 10 only)                        | 71      | 0.9    | 157     | 1.2    | 0.2    | 1.25 |
|              | Tuberculosis                                        | 170     | 2.2    | 88      | 0.7    | -1.5   | 0.30 |
|              | Syphilis                                            | 11      | 0.1    | 15      | 0.1    | 0.0    | 0.82 |
|              | Complications of Pregnancy, Childbirth, Puerperium  | 0       | 0.0    | 0       | 0.0    | 0.0    | n.e. |
|              | Perinatal Period                                    | 0       | 0.0    | ^       | ^      | 0.0    | n.e. |
|              | Other Cause of Death                                | 11,839  | 152.2  | 18,402  | 139.3  | -12.8  | 0.92 |
|              |                                                     |         |        |         |        |        |      |
|              |                                                     |         |        |         |        |        |      |
| <b>Women</b> |                                                     |         |        |         |        |        |      |
| <b>25-39</b> | All Causes of Death                                 | 26,693  | 160.8  | 20,431  | 122.9  | -37.8  | 0.76 |
|              | All Malignant Cancers                               | 3,990   | 24.3   | 3,149   | 19.5   | -4.7   | 0.81 |
|              | Diseases of Heart                                   | 3,325   | 20.1   | 2,952   | 18.2   | -1.9   | 0.91 |
|              | Accidents & Adverse Effects                         | 2,852   | 17.0   | 2,778   | 16.2   | -0.9   | 0.95 |
|              | Homicide & Legal Intervention                       | 2,084   | 12.4   | 1,367   | 7.7    | -4.6   | 0.63 |
|              | HIV                                                 | 4,021   | 24.2   | 1,151   | 7.1    | -17.1  | 0.29 |
|              | Diabetes Mellitus                                   | 661     | 4.0    | 751     | 4.5    | 0.5    | 1.14 |
|              | Complications of Pregnancy, Childbirth, Puerperium  | 364     | 2.2    | 617     | 3.5    | 1.4    | 1.65 |
|              | Cerebrovascular Diseases                            | 885     | 5.4    | 565     | 3.5    | -1.9   | 0.65 |
|              | Suicide & Self-Inflicted Injury                     | 398     | 2.4    | 501     | 2.9    | 0.5    | 1.22 |
|              | Ill-Defined Conditions                              | 788     | 4.7    | 462     | 2.7    | -2.0   | 0.58 |

|              |                                                     |        |        |         |       |        |      |
|--------------|-----------------------------------------------------|--------|--------|---------|-------|--------|------|
|              | Nephritis, Nephrotic Syndrome & Nephrosis           | 436    | 2.6    | 358     | 2.2   | -0.4   | 0.83 |
|              | Septicemia                                          | 418    | 2.5    | 334     | 2.0   | -0.5   | 0.80 |
|              | COPD                                                | 444    | 2.7    | 318     | 1.9   | -0.7   | 0.72 |
|              | Pneumonia & Influenza                               | 348    | 2.1    | 315     | 1.9   | -0.2   | 0.90 |
|              | Chronic Liver Disease/Cirrhosis                     | 281    | 1.7    | 204     | 1.3   | -0.4   | 0.75 |
|              | Hypertension without Heart Disease                  | 199    | 1.2    | 180     | 1.1   | -0.1   | 0.91 |
|              | Congenital Anomalies                                | 221    | 1.3    | 162     | 0.9   | -0.4   | 0.71 |
|              | Other Infectious & Parasitic Diseases               | 314    | 1.9    | 121     | 0.7   | -1.2   | 0.39 |
|              | In situ, benign or unknown behavior neoplasm        | 113    | 0.7    | 105     | 0.7   | 0.0    | 0.96 |
|              | Aortic Aneurysm & Dissection                        | 53     | 0.3    | 59      | 0.4   | 0.0    | 1.14 |
|              | Other Diseases of Arteries, Arterioles, Capillaries | 58     | 0.4    | 43      | 0.3   | -0.1   | 0.74 |
|              | Stomach & Duodenal Ulcers                           | 26     | 0.2    | 10      | 0.1   | -0.1   | 0.39 |
|              | Syphilis                                            | ^      | ^      | 0       | 0.0   | n.e.   | n.e. |
|              | Alzheimers (ICD-9 & 10 only)                        | 0      | 0.0    | 0       | 0.0   | 0.0    | n.e. |
|              | Tuberculosis                                        | 31     | 0.2    | ^       | ^     | n.e.   | n.e. |
|              | Atherosclerosis                                     | 10     | 0.1    | ^       | ^     | n.e.   | n.e. |
|              | Perinatal Period                                    | ^      | ^      | ^       | ^     | n.e.   | n.e. |
|              | Other Cause of Death                                | 4,370  | 26.3   | 3,913   | 23.5  | -2.8   | 0.89 |
|              |                                                     |        |        |         |       |        |      |
| <b>40-49</b> | All Causes of Death                                 | 45,198 | 417.3  | 35,189  | 303.3 | -114.1 | 0.73 |
|              | All Malignant Cancers                               | 11,484 | 106.1  | 9,235   | 79.2  | -27.0  | 0.75 |
|              | Diseases of Heart                                   | 8,500  | 78.6   | 6,712   | 57.7  | -20.9  | 0.73 |
|              | Accidents & Adverse Effects                         | 2,593  | 23.9   | 2,544   | 22.1  | -1.8   | 0.93 |
|              | Cerebrovascular Diseases                            | 2,707  | 25.0   | 1,619   | 13.9  | -11.1  | 0.56 |
|              | HIV                                                 | 3,656  | 33.6   | 1,557   | 13.6  | -20.1  | 0.40 |
|              | Diabetes Mellitus                                   | 1,487  | 13.8   | 1,491   | 12.8  | -0.9   | 0.93 |
|              | Nephritis, Nephrotic Syndrome & Nephrosis           | 804    | 7.4    | 730     | 6.3   | -1.1   | 0.85 |
|              | Septicemia                                          | 797    | 7.4    | 720     | 6.2   | -1.2   | 0.84 |
|              | COPD                                                | 848    | 7.8    | 707     | 6.0   | -1.8   | 0.77 |
|              | Homicide & Legal Intervention                       | 962    | 8.8    | 685     | 6.0   | -2.8   | 0.68 |
|              | Chronic Liver Disease/Cirrhosis                     | 1,049  | 9.7    | 671     | 5.7   | -4.0   | 0.59 |
|              | Pneumonia & Influenza                               | 592    | 5.5    | 494     | 4.3   | -1.2   | 0.78 |
|              | Hypertension without Heart Disease                  | 481    | 4.4    | 489     | 4.2   | -0.2   | 0.95 |
|              | Ill-Defined Conditions                              | 913    | 8.4    | 428     | 3.7   | -4.7   | 0.44 |
|              | Suicide & Self-Inflicted Injury                     | 315    | 2.9    | 388     | 3.4   | 0.5    | 1.18 |
|              | Other Infectious & Parasitic Diseases               | 575    | 5.3    | 283     | 2.4   | -2.9   | 0.46 |
|              | Complications of Pregnancy, Childbirth, Puerperium  | 45     | 0.4    | 191     | 1.7   | 1.3    | 4.14 |
|              | In situ, benign or unknown behavior neoplasm        | 198    | 1.8    | 164     | 1.4   | -0.4   | 0.77 |
|              | Aortic Aneurysm & Dissection                        | 169    | 1.6    | 124     | 1.1   | -0.5   | 0.68 |
|              | Congenital Anomalies                                | 153    | 1.4    | 120     | 1.0   | -0.4   | 0.74 |
|              | Other Diseases of Arteries, Arterioles, Capillaries | 134    | 1.2    | 80      | 0.7   | -0.5   | 0.56 |
|              | Stomach & Duodenal Ulcers                           | 69     | 0.6    | 28      | 0.2   | -0.4   | 0.37 |
|              | Atherosclerosis                                     | 29     | 0.3    | 23      | 0.2   | -0.1   | 0.71 |
|              | Tuberculosis                                        | 29     | 0.3    | 13      | 0.1   | -0.2   | 0.43 |
|              | Syphilis                                            | ^      | ^      | 0       | 0.0   | n.e.   | n.e. |
|              | Alzheimers (ICD-9 & 10 only)                        | ^      | ^      | ^       | ^     | n.e.   | n.e. |
|              | Perinatal Period                                    | 0      | 0.0    | ^       | ^     | n.e.   | n.e. |
|              | Other Cause of Death                                | 6,602  | 60.9   | 5,685   | 49.2  | -11.7  | 0.81 |
|              |                                                     |        |        |         |       |        |      |
| <b>50-64</b> | All Causes of Death                                 | 95,790 | 1014.2 | 127,287 | 814.8 | -199.3 | 0.80 |
|              | All Malignant Cancers                               | 30,504 | 323.2  | 42,059  | 268.7 | -54.4  | 0.83 |
|              | Diseases of Heart                                   | 24,542 | 260.2  | 27,553  | 176.0 | -84.1  | 0.68 |
|              | Diabetes Mellitus                                   | 5,924  | 62.8   | 6,480   | 41.3  | -21.6  | 0.66 |
|              | Cerebrovascular Diseases                            | 5,927  | 62.7   | 6,446   | 41.3  | -21.4  | 0.66 |
|              | Accidents & Adverse Effects                         | 2,020  | 21.2   | 4,162   | 27.2  | 5.9    | 1.28 |
|              | COPD                                                | 2,502  | 26.5   | 4,121   | 26.2  | -0.3   | 0.99 |
|              | Nephritis, Nephrotic Syndrome & Nephrosis           | 2,681  | 28.4   | 3,431   | 21.8  | -6.6   | 0.77 |
|              | Septicemia                                          | 2,123  | 22.5   | 2,996   | 19.1  | -3.4   | 0.85 |
|              | Chronic Liver Disease/Cirrhosis                     | 1,391  | 14.7   | 2,237   | 14.5  | -0.2   | 0.98 |

|                                |                                                     |        |       |        |       |       |      |
|--------------------------------|-----------------------------------------------------|--------|-------|--------|-------|-------|------|
|                                | Hypertension without Heart Disease                  | 1,445  | 15.3  | 2,065  | 13.2  | -2.1  | 0.86 |
|                                | HIV                                                 | 1,448  | 15.1  | 2,005  | 13.2  | -1.9  | 0.87 |
|                                | Pneumonia & Influenza                               | 1,110  | 11.8  | 1,843  | 11.8  | 0.0   | 1.00 |
|                                | Other Infectious & Parasitic Diseases               | 840    | 8.9   | 1,631  | 10.4  | 1.5   | 1.17 |
|                                | Ill-Defined Conditions                              | 923    | 9.7   | 1,125  | 7.2   | -2.5  | 0.75 |
|                                | Homicide & Legal Intervention                       | 366    | 3.8   | 519    | 3.5   | -0.4  | 0.90 |
|                                | In situ, benign or unknown behavior neoplasm        | 391    | 4.1   | 505    | 3.2   | -0.9  | 0.78 |
|                                | Other Diseases of Arteries, Arterioles, Capillaries | 386    | 4.1   | 403    | 2.5   | -1.6  | 0.62 |
|                                | Aortic Aneurysm & Dissection                        | 333    | 3.5   | 362    | 2.3   | -1.2  | 0.66 |
|                                | Suicide & Self-Inflicted Injury                     | 198    | 2.1   | 343    | 2.3   | 0.2   | 1.09 |
|                                | Congenital Anomalies                                | 175    | 1.9   | 259    | 1.7   | -0.2  | 0.90 |
|                                | Alzheimers (ICD-9 & 10 only)                        | 56     | 0.6   | 169    | 1.0   | 0.4   | 1.75 |
|                                | Stomach & Duodenal Ulcers                           | 118    | 1.3   | 140    | 0.9   | -0.4  | 0.72 |
|                                | Atherosclerosis                                     | 174    | 1.8   | 118    | 0.7   | -1.1  | 0.40 |
|                                | Complications of Pregnancy, Childbirth, Puerperium  | 0      | 0.0   | 86     | 0.6   | 0.6   | n.e. |
|                                | Tuberculosis                                        | 51     | 0.5   | 29     | 0.2   | -0.4  | 0.34 |
|                                | Syphilis                                            | ^      | ^     | ^      | ^     | n.e.  | n.e. |
|                                | Perinatal Period                                    | 0      | 0.0   | ^      | ^     | n.e.  | n.e. |
|                                | Other Cause of Death                                | 10,160 | 107.3 | 16,194 | 103.9 | -3.4  | 0.97 |
|                                |                                                     |        |       |        |       |       |      |
|                                |                                                     |        |       |        |       |       |      |
|                                |                                                     |        |       |        |       |       |      |
| <b>Asian/Pacific Islanders</b> |                                                     |        |       |        |       |       |      |
| <b>Men</b>                     |                                                     |        |       |        |       |       |      |
| <b>25-39</b>                   | All Causes of Death                                 | 4,148  | 68.1  | 4,984  | 60.1  | -8.1  | 0.88 |
|                                | Accidents & Adverse Effects                         | 949    | 15.1  | 1,176  | 13.8  | -1.3  | 0.91 |
|                                | Suicide & Self-Inflicted Injury                     | 631    | 10.0  | 957    | 11.3  | 1.3   | 1.13 |
|                                | All Malignant Cancers                               | 682    | 11.5  | 732    | 9.0   | -2.5  | 0.78 |
|                                | Diseases of Heart                                   | 477    | 8.2   | 646    | 8.1   | -0.1  | 0.99 |
|                                | Homicide & Legal Intervention                       | 372    | 5.9   | 301    | 3.5   | -2.4  | 0.59 |
|                                | Cerebrovascular Diseases                            | 139    | 2.5   | 127    | 1.6   | -0.8  | 0.66 |
|                                | Ill-Defined Conditions                              | 140    | 2.3   | 98     | 1.2   | -1.1  | 0.50 |
|                                | Chronic Liver Disease/Cirrhosis                     | 57     | 1.0   | 88     | 1.1   | 0.1   | 1.11 |
|                                | Diabetes Mellitus                                   | 34     | 0.6   | 60     | 0.8   | 0.2   | 1.26 |
|                                | Other Infectious & Parasitic Diseases               | 64     | 1.1   | 55     | 0.7   | -0.4  | 0.64 |
|                                | HIV                                                 | 90     | 1.5   | 49     | 0.6   | -0.9  | 0.38 |
|                                | Congenital Anomalies                                | 39     | 0.6   | 42     | 0.5   | -0.1  | 0.78 |
|                                | Pneumonia & Influenza                               | 29     | 0.5   | 40     | 0.5   | 0.0   | 1.01 |
|                                | COPD                                                | 30     | 0.5   | 37     | 0.5   | 0.0   | 0.91 |
|                                | Septicemia                                          | 21     | 0.3   | 32     | 0.4   | 0.1   | 1.16 |
|                                | Nephritis, Nephrotic Syndrome & Nephrosis           | 21     | 0.4   | 32     | 0.4   | 0.0   | 1.10 |
|                                | Aortic Aneurysm & Dissection                        | 17     | 0.3   | 28     | 0.3   | 0.1   | 1.18 |
|                                | In situ, benign or unknown behavior neoplasm        | 26     | 0.4   | 24     | 0.3   | -0.1  | 0.70 |
|                                | Hypertension without Heart Disease                  | 10     | 0.2   | 13     | 0.2   | 0.0   | 1.03 |
|                                | Syphilis                                            | 0      | 0.0   | 0      | 0.0   | 0.0   | n.e. |
|                                | Alzheimers (ICD-9 & 10 only)                        | 0      | 0.0   | 0      | 0.0   | 0.0   | n.e. |
|                                | Atherosclerosis                                     | ^      | ^     | 0      | 0.0   | n.e.  | n.e. |
|                                | Complications of Pregnancy, Childbirth, Puerperium  | 0      | 0.0   | 0      | 0.0   | 0.0   | n.e. |
|                                | Perinatal Period                                    | ^      | ^     | 0      | 0.0   | n.e.  | n.e. |
|                                | Tuberculosis                                        | 14     | 0.2   | ^      | ^     | n.e.  | n.e. |
|                                | Other Diseases of Arteries, Arterioles, Capillaries | ^      | ^     | ^      | ^     | n.e.  | n.e. |
|                                | Stomach & Duodenal Ulcers                           | ^      | ^     | ^      | ^     | n.e.  | n.e. |
|                                | Other Cause of Death                                | 297    | 4.9   | 425    | 5.2   | 0.3   | 1.05 |
|                                |                                                     |        |       |        |       |       |      |
|                                |                                                     |        |       |        |       |       |      |
|                                |                                                     |        |       |        |       |       |      |
| <b>40-49</b>                   | All Causes of Death                                 | 5,382  | 159.8 | 6,843  | 137.6 | -22.2 | 0.86 |
|                                | All Malignant Cancers                               | 1,571  | 46.7  | 1,779  | 35.8  | -10.9 | 0.77 |
|                                | Diseases of Heart                                   | 1,189  | 35.3  | 1,554  | 31.3  | -4.1  | 0.88 |
|                                | Accidents & Adverse Effects                         | 488    | 14.5  | 735    | 14.8  | 0.3   | 1.02 |
|                                | Suicide & Self-Inflicted Injury                     | 295    | 8.8   | 530    | 10.7  | 1.9   | 1.22 |
|                                | Cerebrovascular Diseases                            | 312    | 9.3   | 395    | 7.9   | -1.3  | 0.86 |
|                                | Diabetes Mellitus                                   | 100    | 3.0   | 218    | 4.4   | 1.4   | 1.48 |

|              |                                                     |        |       |        |       |       |      |
|--------------|-----------------------------------------------------|--------|-------|--------|-------|-------|------|
|              | Chronic Liver Disease/Cirrhosis                     | 161    | 4.8   | 218    | 4.4   | -0.4  | 0.92 |
|              | Homicide & Legal Intervention                       | 199    | 5.9   | 138    | 2.8   | -3.1  | 0.47 |
|              | Other Infectious & Parasitic Diseases               | 148    | 4.4   | 100    | 2.0   | -2.4  | 0.46 |
|              | Ill-Defined Conditions                              | 112    | 3.3   | 85     | 1.7   | -1.6  | 0.51 |
|              | HIV                                                 | 91     | 2.7   | 72     | 1.4   | -1.2  | 0.54 |
|              | Pneumonia & Influenza                               | 41     | 1.2   | 71     | 1.4   | 0.2   | 1.17 |
|              | Nephritis, Nephrotic Syndrome & Nephrosis           | 36     | 1.1   | 68     | 1.4   | 0.3   | 1.28 |
|              | COPD                                                | 46     | 1.4   | 53     | 1.1   | -0.3  | 0.78 |
|              | Hypertension without Heart Disease                  | 30     | 0.9   | 52     | 1.0   | 0.2   | 1.17 |
|              | Aortic Aneurysm & Dissection                        | 42     | 1.2   | 50     | 1.0   | -0.2  | 0.81 |
|              | Septicemia                                          | 52     | 1.5   | 46     | 0.9   | -0.6  | 0.60 |
|              | In situ, benign or unknown behavior neoplasm        | 31     | 0.9   | 43     | 0.9   | -0.1  | 0.94 |
|              | Congenital Anomalies                                | 22     | 0.7   | 29     | 0.6   | -0.1  | 0.89 |
|              | Tuberculosis                                        | 12     | 0.4   | 16     | 0.3   | 0.0   | 0.90 |
|              | Stomach & Duodenal Ulcers                           | ^      | ^     | 15     | 0.3   | n.e.  | n.e. |
|              | Other Diseases of Arteries, Arterioles, Capillaries | ^      | ^     | 11     | 0.2   | n.e.  | n.e. |
|              | Syphilis                                            | 0      | 0.0   | 0      | 0.0   | 0.0   | n.e. |
|              | Complications of Pregnancy, Childbirth, Puerperium  | 0      | 0.0   | 0      | 0.0   | 0.0   | n.e. |
|              | Perinatal Period                                    | 0      | 0.0   | 0      | 0.0   | 0.0   | n.e. |
|              | Alzheimers (ICD-9 & 10 only)                        | ^      | ^     | ^      | ^     | n.e.  | n.e. |
|              | Atherosclerosis                                     | ^      | ^     | ^      | ^     | n.e.  | n.e. |
|              | Other Cause of Death                                | 381    | 11.3  | 562    | 11.3  | 0.0   | 1.00 |
|              |                                                     |        |       |        |       |       |      |
| <b>50-64</b> | All Causes of Death                                 | 14,245 | 488.3 | 22,969 | 407.6 | -80.7 | 0.83 |
|              | All Malignant Cancers                               | 5,132  | 176.2 | 8,300  | 146.8 | -29.4 | 0.83 |
|              | Diseases of Heart                                   | 3,823  | 131.2 | 5,499  | 97.7  | -33.6 | 0.74 |
|              | Cerebrovascular Diseases                            | 1,006  | 34.6  | 1,353  | 24.0  | -10.6 | 0.69 |
|              | Diabetes Mellitus                                   | 525    | 18.0  | 1,021  | 18.0  | 0.0   | 1.00 |
|              | Accidents & Adverse Effects                         | 540    | 18.3  | 1,008  | 18.1  | -0.2  | 0.99 |
|              | Suicide & Self-Inflicted Injury                     | 293    | 9.9   | 652    | 11.8  | 1.9   | 1.19 |
|              | Chronic Liver Disease/Cirrhosis                     | 259    | 8.8   | 523    | 9.4   | 0.5   | 1.06 |
|              | Other Infectious & Parasitic Diseases               | 329    | 11.2  | 418    | 7.4   | -3.8  | 0.66 |
|              | COPD                                                | 266    | 9.2   | 338    | 5.9   | -3.2  | 0.65 |
|              | Pneumonia & Influenza                               | 164    | 5.6   | 325    | 5.7   | 0.1   | 1.01 |
|              | Nephritis, Nephrotic Syndrome & Nephrosis           | 190    | 6.6   | 295    | 5.2   | -1.4  | 0.79 |
|              | Hypertension without Heart Disease                  | 90     | 3.1   | 242    | 4.3   | 1.2   | 1.39 |
|              | Septicemia                                          | 109    | 3.7   | 232    | 4.1   | 0.4   | 1.09 |
|              | Aortic Aneurysm & Dissection                        | 126    | 4.3   | 182    | 3.2   | -1.1  | 0.75 |
|              | Ill-Defined Conditions                              | 109    | 3.7   | 162    | 2.9   | -0.8  | 0.79 |
|              | Homicide & Legal Intervention                       | 157    | 5.3   | 155    | 2.8   | -2.4  | 0.54 |
|              | In situ, benign or unknown behavior neoplasm        | 64     | 2.2   | 115    | 2.0   | -0.2  | 0.92 |
|              | HIV                                                 | 67     | 2.2   | 64     | 1.2   | -1.1  | 0.52 |
|              | Tuberculosis                                        | 40     | 1.4   | 58     | 1.0   | -0.4  | 0.75 |
|              | Stomach & Duodenal Ulcers                           | 26     | 0.9   | 50     | 0.9   | 0.0   | 1.01 |
|              | Congenital Anomalies                                | 26     | 0.9   | 39     | 0.7   | -0.2  | 0.81 |
|              | Other Diseases of Arteries, Arterioles, Capillaries | 35     | 1.2   | 38     | 0.7   | -0.5  | 0.56 |
|              | Atherosclerosis                                     | 18     | 0.6   | 20     | 0.4   | -0.2  | 0.59 |
|              | Alzheimers (ICD-9 & 10 only)                        | ^      | ^     | 18     | 0.3   | n.e.  | n.e. |
|              | Syphilis                                            | 0      | 0.0   | 0      | 0.0   | 0.0   | n.e. |
|              | Complications of Pregnancy, Childbirth, Puerperium  | 0      | 0.0   | 0      | 0.0   | 0.0   | n.e. |
|              | Perinatal Period                                    | ^      | ^     | 0      | 0.0   | n.e.  | n.e. |
|              | Other Cause of Death                                | 844    | 29.0  | 1,862  | 33.0  | 4.0   | 1.14 |
|              |                                                     |        |       |        |       |       |      |
| <b>Women</b> | All Causes of Death                                 | 2,294  | 35.9  | 2,788  | 30.7  | -5.2  | 0.86 |
| <b>25-39</b> | All Malignant Cancers                               | 718    | 11.6  | 869    | 9.8   | -1.75 | 0.85 |
|              | Accidents & Adverse Effects                         | 390    | 5.9   | 384    | 4.1   | -1.83 | 0.69 |
|              | Suicide & Self-Inflicted Injury                     | 220    | 3.3   | 377    | 4.1   | 0.8   | 1.24 |
|              | Diseases of Heart                                   | 148    | 2.3   | 171    | 1.9   | -0.5  | 0.80 |
|              | Homicide & Legal Intervention                       | 188    | 2.9   | 115    | 1.2   | -1.6  | 0.44 |



|              |                                                     |        |       |        |       |       |      |
|--------------|-----------------------------------------------------|--------|-------|--------|-------|-------|------|
|              | Cerebrovascular Diseases                            | 82     | 1.3   | 101    | 1.1   | -0.2  | 0.84 |
|              | Complications of Pregnancy, Childbirth, Puerperium  | 49     | 0.8   | 87     | 1.0   | 0.2   | 1.26 |
|              | Diabetes Mellitus                                   | 18     | 0.3   | 46     | 0.5   | 0.2   | 1.77 |
|              | Ill-Defined Conditions                              | 42     | 0.6   | 43     | 0.5   | -0.2  | 0.75 |
|              | Chronic Liver Disease/Cirrhosis                     | 17     | 0.3   | 29     | 0.3   | 0.0   | 1.17 |
|              | Pneumonia & Influenza                               | 17     | 0.3   | 27     | 0.3   | 0.0   | 1.12 |
|              | Septicemia                                          | 16     | 0.3   | 25     | 0.3   | 0.0   | 1.06 |
|              | Nephritis, Nephrotic Syndrome & Nephrosis           | 19     | 0.3   | 24     | 0.3   | 0.0   | 0.90 |
|              | Other Infectious & Parasitic Diseases               | 19     | 0.3   | 23     | 0.3   | 0.0   | 0.84 |
|              | Congenital Anomalies                                | 27     | 0.4   | 23     | 0.2   | -0.2  | 0.60 |
|              | In situ, benign or unknown behavior neoplasm        | 22     | 0.3   | 17     | 0.2   | -0.1  | 0.57 |
|              | COPD                                                | 19     | 0.3   | 16     | 0.2   | -0.1  | 0.60 |
|              | HIV                                                 | 15     | 0.2   | 11     | 0.1   | -0.1  | 0.53 |
|              | Syphilis                                            | 0      | 0.0   | 0      | 0.0   | 0.0   | n.e. |
|              | Alzheimers (ICD-9 & 10 only)                        | 0      | 0.0   | 0      | 0.0   | 0.0   | n.e. |
|              | Stomach & Duodenal Ulcers                           | ^      | ^     | 0      | 0.0   | n.e.  | n.e. |
|              | Tuberculosis                                        | ^      | ^     | ^      | ^     | n.e.  | n.e. |
|              | Hypertension without Heart Disease                  | ^      | ^     | ^      | ^     | n.e.  | n.e. |
|              | Atherosclerosis                                     | 0      | 0.0   | ^      | ^     | n.e.  | n.e. |
|              | Aortic Aneurysm & Dissection                        | ^      | ^     | ^      | ^     | n.e.  | n.e. |
|              | Other Diseases of Arteries, Arterioles, Capillaries | ^      | ^     | ^      | ^     | n.e.  | n.e. |
|              | Perinatal Period                                    | ^      | ^     | ^      | ^     | n.e.  | n.e. |
|              | Other Cause of Death                                | 241    | 3.8   | 368    | 4.0   | 0.2   | 1.06 |
|              |                                                     |        |       |        |       |       |      |
| <b>40-49</b> | All Causes of Death                                 | 3,742  | 98.3  | 4,496  | 80.1  | -18.2 | 0.81 |
|              | All Malignant Cancers                               | 1,857  | 48.8  | 2,278  | 40.6  | -8.2  | 0.83 |
|              | Diseases of Heart                                   | 329    | 8.6   | 377    | 6.7   | -1.9  | 0.78 |
|              | Cerebrovascular Diseases                            | 285    | 7.5   | 307    | 5.5   | -2.0  | 0.73 |
|              | Accidents & Adverse Effects                         | 283    | 7.4   | 257    | 4.6   | -2.9  | 0.61 |
|              | Suicide & Self-Inflicted Injury                     | 132    | 3.5   | 224    | 4.0   | 0.5   | 1.15 |
|              | Diabetes Mellitus                                   | 68     | 1.8   | 86     | 1.5   | -0.2  | 0.86 |
|              | Homicide & Legal Intervention                       | 91     | 2.4   | 74     | 1.3   | -1.1  | 0.55 |
|              | Septicemia                                          | 33     | 0.9   | 62     | 1.1   | 0.2   | 1.27 |
|              | Chronic Liver Disease/Cirrhosis                     | 44     | 1.2   | 61     | 1.1   | -0.1  | 0.94 |
|              | Pneumonia & Influenza                               | 33     | 0.9   | 55     | 1.0   | 0.1   | 1.13 |
|              | Other Infectious & Parasitic Diseases               | 54     | 1.4   | 49     | 0.9   | -0.5  | 0.62 |
|              | Nephritis, Nephrotic Syndrome & Nephrosis           | 28     | 0.7   | 42     | 0.7   | 0.0   | 1.02 |
|              | COPD                                                | 45     | 1.2   | 39     | 0.7   | -0.5  | 0.59 |
|              | In situ, benign or unknown behavior neoplasm        | 19     | 0.5   | 29     | 0.5   | 0.0   | 1.03 |
|              | Ill-Defined Conditions                              | 47     | 1.2   | 26     | 0.5   | -0.8  | 0.37 |
|              | Hypertension without Heart Disease                  | 21     | 0.5   | 21     | 0.4   | -0.2  | 0.68 |
|              | Aortic Aneurysm & Dissection                        | 11     | 0.3   | 21     | 0.4   | 0.1   | 1.30 |
|              | Congenital Anomalies                                | 22     | 0.6   | 21     | 0.4   | -0.2  | 0.64 |
|              | Complications of Pregnancy, Childbirth, Puerperium  | ^      | ^     | 20     | 0.4   | n.e.  | n.e. |
|              | HIV                                                 | 20     | 0.5   | 14     | 0.2   | -0.3  | 0.47 |
|              | Syphilis                                            | 0      | 0.0   | 0      | 0.0   | 0.0   | n.e. |
|              | Stomach & Duodenal Ulcers                           | ^      | ^     | 0      | 0.0   | n.e.  | n.e. |
|              | Perinatal Period                                    | 0      | 0.0   | 0      | 0.0   | 0.0   | n.e. |
|              | Tuberculosis                                        | ^      | ^     | ^      | ^     | n.e.  | n.e. |
|              | Alzheimers (ICD-9 & 10 only)                        | ^      | ^     | ^      | ^     | n.e.  | n.e. |
|              | Atherosclerosis                                     | ^      | ^     | ^      | ^     | n.e.  | n.e. |
|              | Other Diseases of Arteries, Arterioles, Capillaries | ^      | ^     | ^      | ^     | n.e.  | n.e. |
|              | Other Cause of Death                                | 287    | 7.5   | 415    | 7.4   | -0.2  | 0.98 |
|              |                                                     |        |       |        |       |       |      |
| <b>50-64</b> | All Causes of Death                                 | 10,127 | 304.2 | 15,871 | 235.7 | -68.4 | 0.78 |
|              | All Malignant Cancers                               | 4,746  | 142.0 | 8,075  | 120.3 | -21.8 | 0.85 |
|              | Diseases of Heart                                   | 1,570  | 47.6  | 2,000  | 29.3  | -18.3 | 0.62 |
|              | Cerebrovascular Diseases                            | 910    | 27.4  | 1,088  | 16.2  | -11.2 | 0.59 |
|              | Diabetes Mellitus                                   | 363    | 11.0  | 578    | 8.5   | -2.6  | 0.77 |

|                                       |                                                     |       |       |       |       |      |      |
|---------------------------------------|-----------------------------------------------------|-------|-------|-------|-------|------|------|
|                                       | Accidents & Adverse Effects                         | 383   | 11.3  | 573   | 8.7   | -2.6 | 0.77 |
|                                       | Suicide & Self-Inflicted Injury                     | 124   | 3.6   | 285   | 4.4   | 0.8  | 1.22 |
|                                       | Other Infectious & Parasitic Diseases               | 225   | 6.8   | 231   | 3.4   | -3.4 | 0.50 |
|                                       | Pneumonia & Influenza                               | 99    | 3.0   | 224   | 3.3   | 0.3  | 1.09 |
|                                       | Nephritis, Nephrotic Syndrome & Nephrosis           | 168   | 5.1   | 216   | 3.2   | -1.9 | 0.63 |
|                                       | COPD                                                | 154   | 4.7   | 208   | 3.0   | -1.7 | 0.65 |
|                                       | Chronic Liver Disease/Cirrhosis                     | 117   | 3.5   | 171   | 2.5   | -1.0 | 0.73 |
|                                       | Septicemia                                          | 110   | 3.3   | 165   | 2.4   | -0.9 | 0.73 |
|                                       | Hypertension without Heart Disease                  | 71    | 2.1   | 134   | 2.0   | -0.2 | 0.92 |
|                                       | In situ, benign or unknown behavior neoplasm        | 53    | 1.6   | 107   | 1.6   | 0.0  | 1.00 |
|                                       | Ill-Defined Conditions                              | 71    | 2.1   | 94    | 1.4   | -0.7 | 0.67 |
|                                       | Homicide & Legal Intervention                       | 65    | 1.9   | 87    | 1.3   | -0.6 | 0.69 |
|                                       | Aortic Aneurysm & Dissection                        | 42    | 1.2   | 74    | 1.1   | -0.2 | 0.87 |
|                                       | Other Diseases of Arteries, Arterioles, Capillaries | 26    | 0.8   | 35    | 0.5   | -0.3 | 0.67 |
|                                       | Congenital Anomalies                                | 24    | 0.7   | 32    | 0.5   | -0.2 | 0.69 |
|                                       | Tuberculosis                                        | 15    | 0.5   | 29    | 0.4   | 0.0  | 0.94 |
|                                       | Alzheimers (ICD-9 & 10 only)                        | 20    | 0.6   | 28    | 0.4   | -0.2 | 0.65 |
|                                       | Stomach & Duodenal Ulcers                           | 17    | 0.5   | 17    | 0.3   | -0.3 | 0.49 |
|                                       | HIV                                                 | ^     | ^     | 16    | 0.2   | n.e. | n.e. |
|                                       | Syphilis                                            | 0     | 0.0   | 0     | 0.0   | 0.0  | n.e. |
|                                       | Perinatal Period                                    | 0     | 0.0   | 0     | 0.0   | 0.0  | n.e. |
|                                       | Atherosclerosis                                     | ^     | ^     | ^     | ^     | n.e. | n.e. |
|                                       | Complications of Pregnancy, Childbirth, Puerperium  | 0     | 0.0   | ^     | ^     | n.e. | n.e. |
|                                       | Other Cause of Death                                | 739   | 22.3  | 1,399 | 20.7  | -1.6 | 0.93 |
|                                       | All Causes of Death                                 | 4,148 | 68.1  | 4,984 | 60.1  | -8.1 | 0.88 |
|                                       |                                                     |       |       |       |       |      |      |
| <b>American Indian/Alaska Natives</b> |                                                     |       |       |       |       |      |      |
| <b>Men</b>                            |                                                     |       |       |       |       |      |      |
| <b>25-39</b>                          | All Causes of Death                                 | 2,304 | 377.2 | 2,935 | 442.7 | 65.5 | 1.17 |
|                                       | Accidents & Adverse Effects                         | 870   | 141.3 | 1,110 | 162.9 | 21.7 | 1.15 |
|                                       | Suicide & Self-Inflicted Injury                     | 313   | 50.4  | 401   | 58.1  | 7.8  | 1.15 |
|                                       | Chronic Liver Disease/Cirrhosis                     | 163   | 27.5  | 263   | 42.7  | 15.2 | 1.55 |
|                                       | Homicide & Legal Intervention                       | 193   | 31.2  | 235   | 33.9  | 2.7  | 1.09 |
|                                       | Diseases of Heart                                   | 147   | 24.6  | 193   | 30.7  | 6.1  | 1.25 |
|                                       | All Malignant Cancers                               | 87    | 14.4  | 91    | 14.0  | -0.4 | 0.97 |
|                                       | Ill-Defined Conditions                              | 53    | 8.7   | 76    | 11.1  | 2.5  | 1.29 |
|                                       | Diabetes Mellitus                                   | 33    | 5.6   | 73    | 12.3  | 6.8  | 2.21 |
|                                       | Pneumonia & Influenza                               | 27    | 4.4   | 36    | 5.7   | 1.3  | 1.29 |
|                                       | Septicemia                                          | 17    | 2.8   | 28    | 4.6   | 1.8  | 1.65 |
|                                       | Other Infectious & Parasitic Diseases               | 10    | 1.7   | 21    | 3.5   | 1.8  | 2.03 |
|                                       | Cerebrovascular Diseases                            | 13    | 2.2   | 18    | 2.8   | 0.6  | 1.29 |
|                                       | HIV                                                 | 52    | 8.8   | 16    | 2.5   | -6.2 | 0.29 |
|                                       | COPD                                                | 11    | 1.8   | 15    | 2.5   | 0.8  | 1.42 |
|                                       | Congenital Anomalies                                | ^     | ^     | 15    | 2.2   | n.e. | n.e. |
|                                       | Syphilis                                            | 0     | 0.0   | 0     | 0.0   | 0.0  | n.e. |
|                                       | Alzheimers (ICD-9 & 10 only)                        | 0     | 0.0   | 0     | 0.0   | 0.0  | n.e. |
|                                       | Atherosclerosis                                     | 0     | 0.0   | 0     | 0.0   | 0.0  | n.e. |
|                                       | Other Diseases of Arteries, Arterioles, Capillaries | ^     | ^     | 0     | 0.0   | n.e. | n.e. |
|                                       | Complications of Pregnancy, Childbirth, Puerperium  | 0     | 0.0   | 0     | 0.0   | 0.0  | n.e. |
|                                       | In situ, benign or unknown behavior neoplasm        | ^     | ^     | ^     | ^     | n.e. | n.e. |
|                                       | Tuberculosis                                        | ^     | ^     | ^     | ^     | n.e. | n.e. |
|                                       | Hypertension without Heart Disease                  | ^     | ^     | ^     | ^     | n.e. | n.e. |
|                                       | Aortic Aneurysm & Dissection                        | ^     | ^     | ^     | ^     | n.e. | n.e. |
|                                       | COPD                                                | ^     | ^     | ^     | ^     | n.e. | n.e. |
|                                       | Stomach & Duodenal Ulcers                           | 0     | 0.0   | ^     | ^     | n.e. | n.e. |
|                                       | Perinatal Period                                    | 0     | 0.0   | ^     | ^     | n.e. | n.e. |
|                                       | Other Cause of Death                                | 292   | 48.2  | 321   | 49.4  | 1.1  | 1.02 |
|                                       |                                                     |       |       |       |       |      |      |

|              |                                                     |       |        |       |        |       |      |
|--------------|-----------------------------------------------------|-------|--------|-------|--------|-------|------|
| <b>40-49</b> | All Causes of Death                                 | 2,395 | 635.1  | 3,034 | 755.1  | 120.0 | 1.19 |
|              | Accidents & Adverse Effects                         | 504   | 133.4  | 705   | 176.5  | 43.1  | 1.32 |
|              | Diseases of Heart                                   | 351   | 93.3   | 472   | 116.7  | 23.4  | 1.25 |
|              | Chronic Liver Disease/Cirrhosis                     | 310   | 82.2   | 399   | 99.4   | 17.2  | 1.21 |
|              | All Malignant Cancers                               | 209   | 55.6   | 225   | 55.2   | -0.4  | 0.99 |
|              | Suicide & Self-Inflicted Injury                     | 106   | 28.0   | 197   | 49.8   | 21.8  | 1.78 |
|              | Diabetes Mellitus                                   | 105   | 28.1   | 170   | 42.2   | 14.1  | 1.50 |
|              | Homicide & Legal Intervention                       | 84    | 22.2   | 106   | 26.7   | 4.6   | 1.21 |
|              | Ill-Defined Conditions                              | 54    | 14.3   | 56    | 14.4   | 0.1   | 1.01 |
|              | Other Infectious & Parasitic Diseases               | 41    | 10.9   | 52    | 12.7   | 1.9   | 1.17 |
|              | Cerebrovascular Diseases                            | 58    | 15.4   | 42    | 10.3   | -5.0  | 0.67 |
|              | Pneumonia & Influenza                               | 49    | 12.9   | 42    | 10.3   | -2.6  | 0.80 |
|              | Septicemia                                          | 32    | 8.5    | 38    | 9.4    | 0.9   | 1.10 |
|              | HIV                                                 | 52    | 13.7   | 31    | 7.7    | -6.0  | 0.56 |
|              | Nephritis, Nephrotic Syndrome & Nephrosis           | 33    | 8.7    | 30    | 7.3    | -1.4  | 0.84 |
|              | COPD                                                | 21    | 5.6    | 22    | 5.3    | -0.3  | 0.95 |
|              | Hypertension without Heart Disease                  | ^     | ^      | 15    | 3.6    | n.e.  | n.e. |
|              | Congenital Anomalies                                | ^     | ^      | 10    | 2.5    | n.e.  | n.e. |
|              | Syphilis                                            | 0     | 0.0    | 0     | 0.0    | 0.0   | n.e. |
|              | Alzheimers (ICD-9 & 10 only)                        | ^     | ^      | 0     | 0.0    | n.e.  | n.e. |
|              | Complications of Pregnancy, Childbirth, Puerperium  | 0     | 0.0    | 0     | 0.0    | 0.0   | n.e. |
|              | Perinatal Period                                    | 0     | 0.0    | 0     | 0.0    | 0.0   | n.e. |
|              | In situ, benign or unknown behavior neoplasm        | ^     | ^      | ^     | ^      | n.e.  | n.e. |
|              | Tuberculosis                                        | ^     | ^      | ^     | ^      | n.e.  | n.e. |
|              | Atherosclerosis                                     | ^     | ^      | ^     | ^      | n.e.  | n.e. |
|              | Aortic Aneurysm & Dissection                        | ^     | ^      | ^     | ^      | n.e.  | n.e. |
|              | Other Diseases of Arteries, Arterioles, Capillaries | ^     | ^      | ^     | ^      | n.e.  | n.e. |
|              | Stomach & Duodenal Ulcers                           | ^     | ^      | ^     | ^      | n.e.  | n.e. |
|              | Other Cause of Death                                | 356   | 94.4   | 405   | 100.7  | 6.4   | 1.07 |
| <b>50-64</b> | All Causes of Death                                 | 4,260 | 1317.5 | 7,261 | 1408.6 | 91.1  | 1.07 |
|              | Diseases of Heart                                   | 1,019 | 317.6  | 1,519 | 293.9  | -23.6 | 0.93 |
|              | All Malignant Cancers                               | 838   | 261.4  | 1,390 | 267.5  | 6.1   | 1.02 |
|              | Accidents & Adverse Effects                         | 404   | 122.8  | 860   | 168.9  | 46.1  | 1.38 |
|              | Chronic Liver Disease/Cirrhosis                     | 375   | 114.6  | 645   | 126.1  | 11.5  | 1.10 |
|              | Diabetes Mellitus                                   | 329   | 102.5  | 520   | 100.2  | -2.3  | 0.98 |
|              | COPD                                                | 87    | 27.4   | 210   | 40.3   | 12.8  | 1.47 |
|              | Cerebrovascular Diseases                            | 127   | 39.4   | 185   | 35.7   | -3.7  | 0.91 |
|              | Other Infectious & Parasitic Diseases               | 45    | 13.6   | 152   | 29.4   | 15.8  | 2.16 |
|              | Suicide & Self-Inflicted Injury                     | 71    | 21.3   | 123   | 24.2   | 2.9   | 1.14 |
|              | Pneumonia & Influenza                               | 66    | 20.3   | 122   | 23.6   | 3.3   | 1.16 |
|              | Septicemia                                          | 62    | 19.0   | 121   | 23.5   | 4.5   | 1.24 |
|              | Nephritis, Nephrotic Syndrome & Nephrosis           | 79    | 24.5   | 101   | 19.5   | -5.0  | 0.80 |
|              | Homicide & Legal Intervention                       | 40    | 11.9   | 80    | 15.8   | 3.9   | 1.33 |
|              | Ill-Defined Conditions                              | 68    | 20.7   | 73    | 14.3   | -6.4  | 0.69 |
|              | Hypertension without Heart Disease                  | 20    | 6.3    | 65    | 12.4   | 6.1   | 1.97 |
|              | HIV                                                 | 14    | 4.1    | 27    | 5.3    | 1.2   | 1.29 |
|              | Stomach & Duodenal Ulcers                           | 10    | 3.1    | 15    | 2.9    | -0.2  | 0.95 |
|              | In situ, benign or unknown behavior neoplasm        | ^     | ^      | 13    | 2.5    | n.e.  | n.e. |
|              | Congenital Anomalies                                | ^     | ^      | 13    | 2.5    | n.e.  | n.e. |
|              | Aortic Aneurysm & Dissection                        | 10    | 3.1    | 12    | 2.4    | -0.8  | 0.75 |
|              | Other Diseases of Arteries, Arterioles, Capillaries | 12    | 3.7    | 12    | 2.3    | -1.4  | 0.63 |
|              | Atherosclerosis                                     | 11    | 3.4    | 11    | 2.1    | -1.2  | 0.64 |
|              | Syphilis                                            | 0     | 0.0    | 0     | 0.0    | 0.0   | n.e. |
|              | Complications of Pregnancy, Childbirth, Puerperium  | 0     | 0.0    | 0     | 0.0    | 0.0   | n.e. |
|              | Perinatal Period                                    | 0     | 0.0    | 0     | 0.0    | 0.0   | n.e. |
|              | Tuberculosis                                        | ^     | ^      | ^     | ^      | n.e.  | n.e. |
|              | Alzheimers (ICD-9 & 10 only)                        | 0     | 0.0    | ^     | ^      | n.e.  | n.e. |
|              | Other Cause of Death                                | 551   | 169.8  | 978   | 190.4  | 20.6  | 1.12 |

|              |                                                        |       |       |       |       |       |      |
|--------------|--------------------------------------------------------|-------|-------|-------|-------|-------|------|
| <b>Women</b> |                                                        |       |       |       |       |       |      |
| <b>25-39</b> | All Causes of Death                                    | 1,160 | 182.2 | 1,585 | 240.0 | 57.9  | 1.32 |
|              | Accidents & Adverse Effects                            | 367   | 57.1  | 476   | 69.0  | 11.8  | 1.21 |
|              | Chronic Liver Disease/Cirrhosis                        | 132   | 21.1  | 212   | 33.1  | 12.1  | 1.57 |
|              | Suicide & Self-Inflicted Injury                        | 72    | 11.1  | 114   | 16.6  | 5.5   | 1.49 |
|              | Diseases of Heart                                      | 69    | 10.9  | 102   | 16.5  | 5.6   | 1.51 |
|              | All Malignant Cancers                                  | 111   | 17.6  | 101   | 16.0  | -1.6  | 0.91 |
|              | Homicide & Legal Intervention                          | 65    | 10.1  | 53    | 7.5   | -2.5  | 0.75 |
|              | Ill-Defined Conditions                                 | 32    | 5.0   | 49    | 7.4   | 2.4   | 1.48 |
|              | Diabetes Mellitus                                      | 12    | 1.9   | 48    | 7.6   | 5.7   | 3.99 |
|              | Septicemia                                             | 16    | 2.6   | 34    | 5.3   | 2.7   | 2.07 |
|              | Complications of Pregnancy,<br>Childbirth, Puerperium  | ^     | ^     | 29    | 4.4   | n.e.  | n.e. |
|              | Cerebrovascular Diseases                               | 29    | 4.6   | 23    | 3.4   | -1.2  | 0.74 |
|              | Pneumonia & Influenza                                  | 18    | 2.8   | 21    | 3.2   | 0.4   | 1.14 |
|              | Other Infectious & Parasitic Diseases                  | ^     | ^     | 16    | 2.5   | n.e.  | n.e. |
|              | Nephritis, Nephrotic Syndrome &<br>Nephrosis           | 10    | 1.6   | 10    | 1.4   | -0.2  | 0.90 |
|              | Syphilis                                               | 0     | 0.0   | 0     | 0.0   | 0.0   | n.e. |
|              | Alzheimers (ICD-9 & 10 only)                           | 0     | 0.0   | 0     | 0.0   | 0.0   | n.e. |
|              | Atherosclerosis                                        | 0     | 0.0   | 0     | 0.0   | 0.0   | n.e. |
|              | Stomach & Duodenal Ulcers                              | ^     | ^     | 0     | 0.0   | n.e.  | n.e. |
|              | Perinatal Period                                       | 0     | 0.0   | 0     | 0.0   | 0.0   | n.e. |
|              | In situ, benign or unknown behavior<br>neoplasm        | ^     | ^     | ^     | ^     | n.e.  | n.e. |
|              | Tuberculosis                                           | ^     | ^     | ^     | ^     | n.e.  | n.e. |
|              | HIV                                                    | 17    | 2.7   | ^     | ^     | n.e.  | n.e. |
|              | Hypertension without Heart Disease                     | ^     | ^     | ^     | ^     | n.e.  | n.e. |
|              | Aortic Aneurysm & Dissection                           | ^     | ^     | ^     | ^     | n.e.  | n.e. |
|              | Other Diseases of Arteries, Arterioles,<br>Capillaries | ^     | ^     | ^     | ^     | n.e.  | n.e. |
|              | COPD                                                   | ^     | ^     | ^     | ^     | n.e.  | n.e. |
|              | Congenital Anomalies                                   | ^     | ^     | ^     | ^     | n.e.  | n.e. |
|              | Other Cause of Death                                   | 163   | 25.7  | 263   | 40.8  | 15.1  | 1.59 |
| <b>40-49</b> | All Causes of Death                                    | 1,429 | 342.8 | 1,996 | 467.9 | 125.1 | 1.37 |
|              | Chronic Liver Disease/Cirrhosis                        | 209   | 50.2  | 367   | 85.8  | 35.6  | 1.71 |
|              | Accidents & Adverse Effects                            | 239   | 57.1  | 343   | 81.9  | 24.7  | 1.43 |
|              | All Malignant Cancers                                  | 232   | 55.8  | 253   | 58.4  | 2.6   | 1.05 |
|              | Diseases of Heart                                      | 121   | 29.1  | 203   | 47.6  | 18.5  | 1.64 |
|              | Diabetes Mellitus                                      | 64    | 15.4  | 101   | 23.5  | 8.0   | 1.52 |
|              | Cerebrovascular Diseases                               | 70    | 16.8  | 52    | 12.0  | -4.8  | 0.71 |
|              | Suicide & Self-Inflicted Injury                        | 36    | 8.6   | 51    | 12.1  | 3.5   | 1.40 |
|              | Septicemia                                             | 23    | 5.6   | 48    | 11.0  | 5.5   | 1.99 |
|              | Pneumonia & Influenza                                  | 24    | 5.8   | 45    | 10.8  | 5.1   | 1.88 |
|              | Other Infectious & Parasitic Diseases                  | 33    | 7.9   | 32    | 7.4   | -0.5  | 0.93 |
|              | Nephritis, Nephrotic Syndrome &<br>Nephrosis           | 25    | 6.0   | 31    | 7.3   | 1.3   | 1.21 |
|              | COPD                                                   | 21    | 5.0   | 29    | 6.7   | 1.6   | 1.32 |
|              | Homicide & Legal Intervention                          | 26    | 6.2   | 27    | 6.4   | 0.2   | 1.03 |
|              | Ill-Defined Conditions                                 | 22    | 5.3   | 25    | 5.8   | 0.5   | 1.10 |
|              | Syphilis                                               | 0     | 0.0   | 0     | 0.0   | 0.0   | n.e. |
|              | Alzheimers (ICD-9 & 10 only)                           | 0     | 0.0   | 0     | 0.0   | 0.0   | n.e. |
|              | In situ, benign or unknown behavior<br>neoplasm        | ^     | ^     | ^     | ^     | n.e.  | n.e. |
|              | Tuberculosis                                           | ^     | ^     | ^     | ^     | n.e.  | n.e. |
|              | HIV                                                    | 11    | 2.6   | ^     | ^     | n.e.  | n.e. |
|              | Hypertension without Heart Disease                     | ^     | ^     | ^     | ^     | n.e.  | n.e. |
|              | Atherosclerosis                                        | ^     | ^     | ^     | ^     | n.e.  | n.e. |
|              | Aortic Aneurysm & Dissection                           | 0     | 0.0   | ^     | ^     | n.e.  | n.e. |
|              | Other Diseases of Arteries, Arterioles,<br>Capillaries | ^     | ^     | ^     | ^     | n.e.  | n.e. |
|              | Stomach & Duodenal Ulcers                              | ^     | ^     | ^     | ^     | n.e.  | n.e. |
|              | Complications of Pregnancy,<br>Childbirth, Puerperium  | 0     | 0.0   | ^     | ^     | n.e.  | n.e. |
|              | Congenital Anomalies                                   | ^     | ^     | ^     | ^     | n.e.  | n.e. |

|              |                                                     |       |       |       |       |       |      |
|--------------|-----------------------------------------------------|-------|-------|-------|-------|-------|------|
|              | Perinatal Period                                    | 0     | 0.0   | ^     | ^     | n.e.  | n.e. |
|              | Other Cause of Death                                | 250   | 60.0  | 348   | 81.7  | 21.7  | 1.36 |
| <b>50-64</b> | All Causes of Death                                 | 3,078 | 860.8 | 5,055 | 863.1 | 2.3   | 1.00 |
|              | All Malignant Cancers                               | 804   | 225.2 | 1,206 | 205.3 | -19.9 | 0.91 |
|              | Diseases of Heart                                   | 501   | 140.5 | 695   | 117.9 | -22.6 | 0.84 |
|              | Chronic Liver Disease/Cirrhosis                     | 232   | 64.3  | 503   | 87.5  | 23.2  | 1.36 |
|              | Diabetes Mellitus                                   | 315   | 88.4  | 420   | 71.1  | -17.2 | 0.80 |
|              | Accidents & Adverse Effects                         | 173   | 48.0  | 384   | 66.8  | 18.8  | 1.39 |
|              | COPD                                                | 110   | 31.2  | 231   | 39.0  | 7.8   | 1.25 |
|              | Cerebrovascular Diseases                            | 129   | 36.1  | 156   | 26.5  | -9.7  | 0.73 |
|              | Septicemia                                          | 62    | 17.4  | 111   | 18.9  | 1.5   | 1.09 |
|              | Other Infectious & Parasitic Diseases               | 40    | 11.2  | 109   | 18.7  | 7.4   | 1.66 |
|              | Nephritis, Nephrotic Syndrome & Nephrosis           | 88    | 24.8  | 106   | 17.8  | -7.0  | 0.72 |
|              | Pneumonia & Influenza                               | 44    | 12.3  | 104   | 17.9  | 5.5   | 1.45 |
|              | Ill-Defined Conditions                              | 32    | 8.9   | 51    | 8.7   | -0.2  | 0.98 |
|              | Hypertension without Heart Disease                  | 11    | 3.2   | 37    | 6.2   | 3.0   | 1.97 |
|              | Suicide & Self-Inflicted Injury                     | 18    | 5.0   | 36    | 6.2   | 1.2   | 1.24 |
|              | Other Diseases of Arteries, Arterioles, Capillaries | 11    | 3.0   | 24    | 4.0   | 0.9   | 1.31 |
|              | In situ, benign or unknown behavior neoplasm        | ^     | ^     | 18    | 3.0   | n.e.  | n.e. |
|              | HIV                                                 | ^     | ^     | 17    | 2.9   | n.e.  | n.e. |
|              | Alzheimers (ICD-9 & 10 only)                        | ^     | ^     | 11    | 1.8   | n.e.  | n.e. |
|              | Congenital Anomalies                                | ^     | ^     | 11    | 1.9   | n.e.  | n.e. |
|              | Homicide & Legal Intervention                       | 20    | 5.5   | 11    | 1.8   | -3.6  | 0.34 |
|              | Stomach & Duodenal Ulcers                           | ^     | ^     | 10    | 1.7   | n.e.  | n.e. |
|              | Syphilis                                            | 0     | 0.0   | 0     | 0.0   | 0.0   | n.e. |
|              | Tuberculosis                                        | ^     | ^     | ^     | ^     | n.e.  | n.e. |
|              | Atherosclerosis                                     | ^     | ^     | ^     | ^     | n.e.  | n.e. |
|              | Aortic Aneurysm & Dissection                        | ^     | ^     | ^     | ^     | n.e.  | n.e. |
|              | Complications of Pregnancy, Childbirth, Puerperium  | 0     | 0.0   | ^     | ^     | n.e.  | n.e. |
|              | Perinatal Period                                    | 0     | 0.0   | 0     | 0.0   | 0.0   | n.e. |
|              | Other Cause of Death                                | 442   | 123.0 | 787   | 134.4 | 11.4  | 1.09 |
|              | All Causes of Death                                 | 2,304 | 377.2 | 2,935 | 442.7 | 65.5  | 1.17 |
|              |                                                     |       |       |       |       |       |      |
|              |                                                     |       |       |       |       |       |      |

MR Underlying mortality data provided by NCHS ([www.cdc.gov/nchs](http://www.cdc.gov/nchs)).  
Mortality rate. Rates are per 100,000 & age-adjusted to the 2000 US Std Population.  
n.e. Not estimable.  
^ Statistic not displayed due to fewer than 10 cases.  
LL Lower limit of 95% confidence interval.  
UL Upper limit of 95% confidence interval.  
Rate ratios are age-adjusted and compare rates in 2011-2014 to 1999-2002

Table S5. ICD-10 codes for sub-categories of accidental deaths.

|                                                         |                                                                                                                                                                             |
|---------------------------------------------------------|-----------------------------------------------------------------------------------------------------------------------------------------------------------------------------|
| All accidents:                                          | V01-X59, Y85-Y86                                                                                                                                                            |
| Motor vehicle accidents                                 | V02-V04, V09.0, V09.2, V12-V14, V19.0-V19.2, V19.4-V19.6, V20-V79, V80.3-V80.5, V81.0-V81.1, V82.0-V82.1, V83-V86, V87.0-V87.8, V88.0-V88.8, V89.0, V89.2                   |
| Other transport accidents                               | V01, V05 V06, V09.1, V09.3 V09.9, V10 V11, V15 V18, V19.3, V19.8 V19.9, V80.0 V80.2, V80.6 V80.9, V81.2 V81.9, V82.2 V82.9, V87.9, V88.9, V89.1, V89.3, V89.9, V90 V99, Y85 |
| Accidental poisoning and exposure to noxious substances | X40 X49                                                                                                                                                                     |
| Other non-transport accidents                           | W00 X39, X50-X59, Y86                                                                                                                                                       |

Supplemental Figure 1 legend. Birth cohort relative risks of mortality among 25-64 year-olds by sex in A) Canada, England/Wales, and the United States, and B) the United States by race and ethnicity. Points represent relative risks and lines represent confidence intervals. Relative risks represent mortality in any given birth year relative to 1962 (the mid-point of the birth cohorts included in the study).

**Figure S1. Birth cohort relative risks of mortality among 25-64 year-olds by sex in A) Canada, England/Wales, and the United States, and B) the United States by race and ethnicity.**

A.

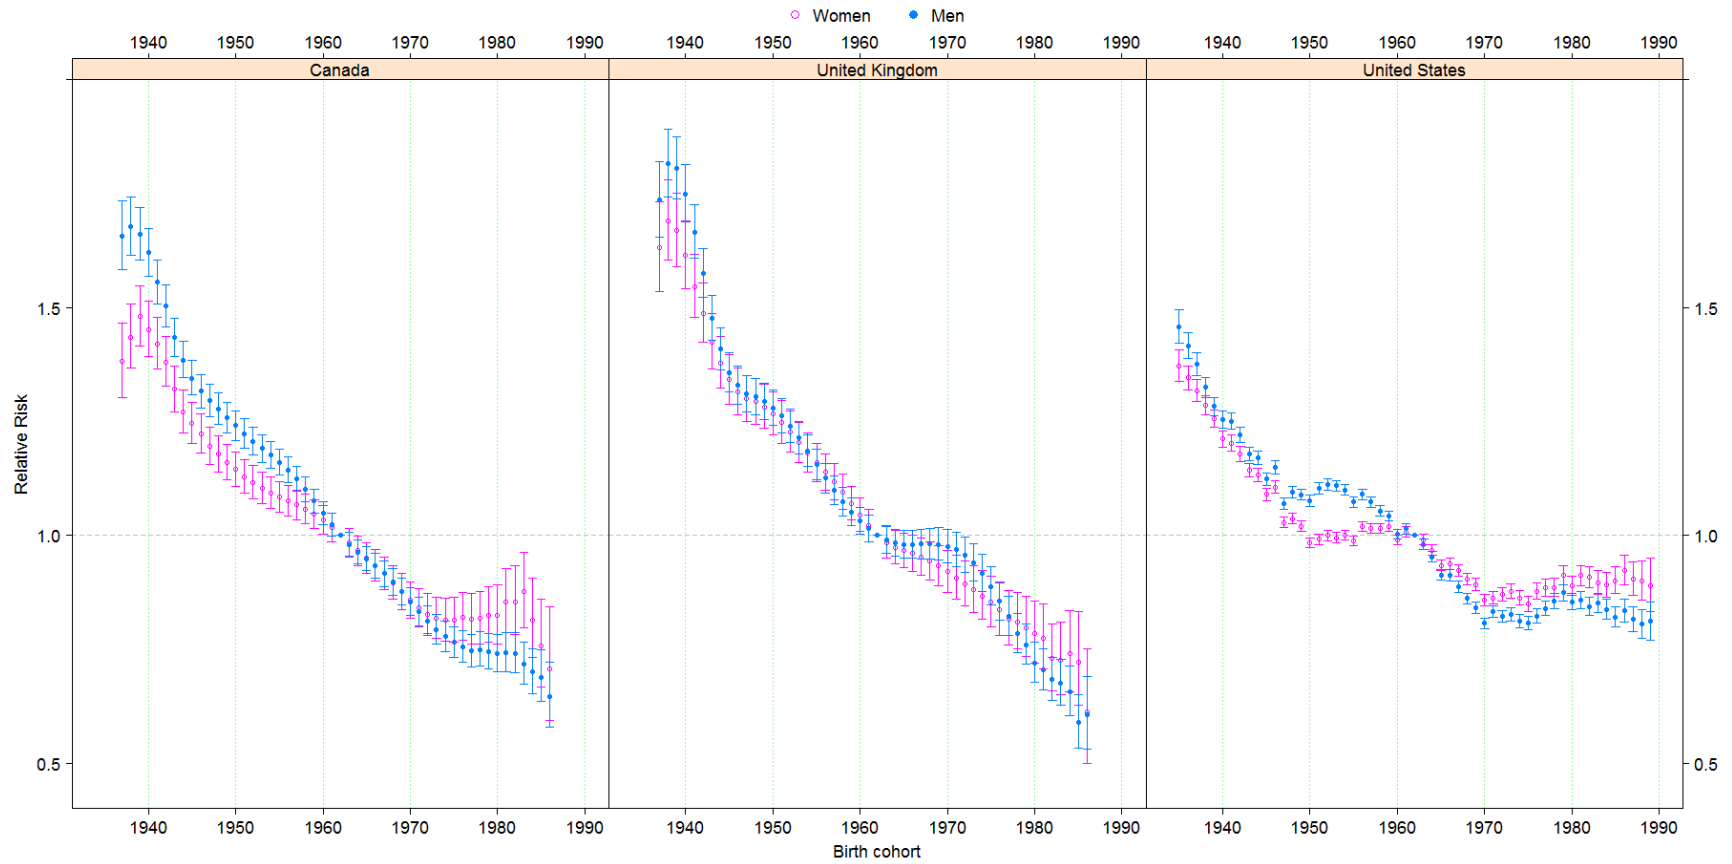



B.

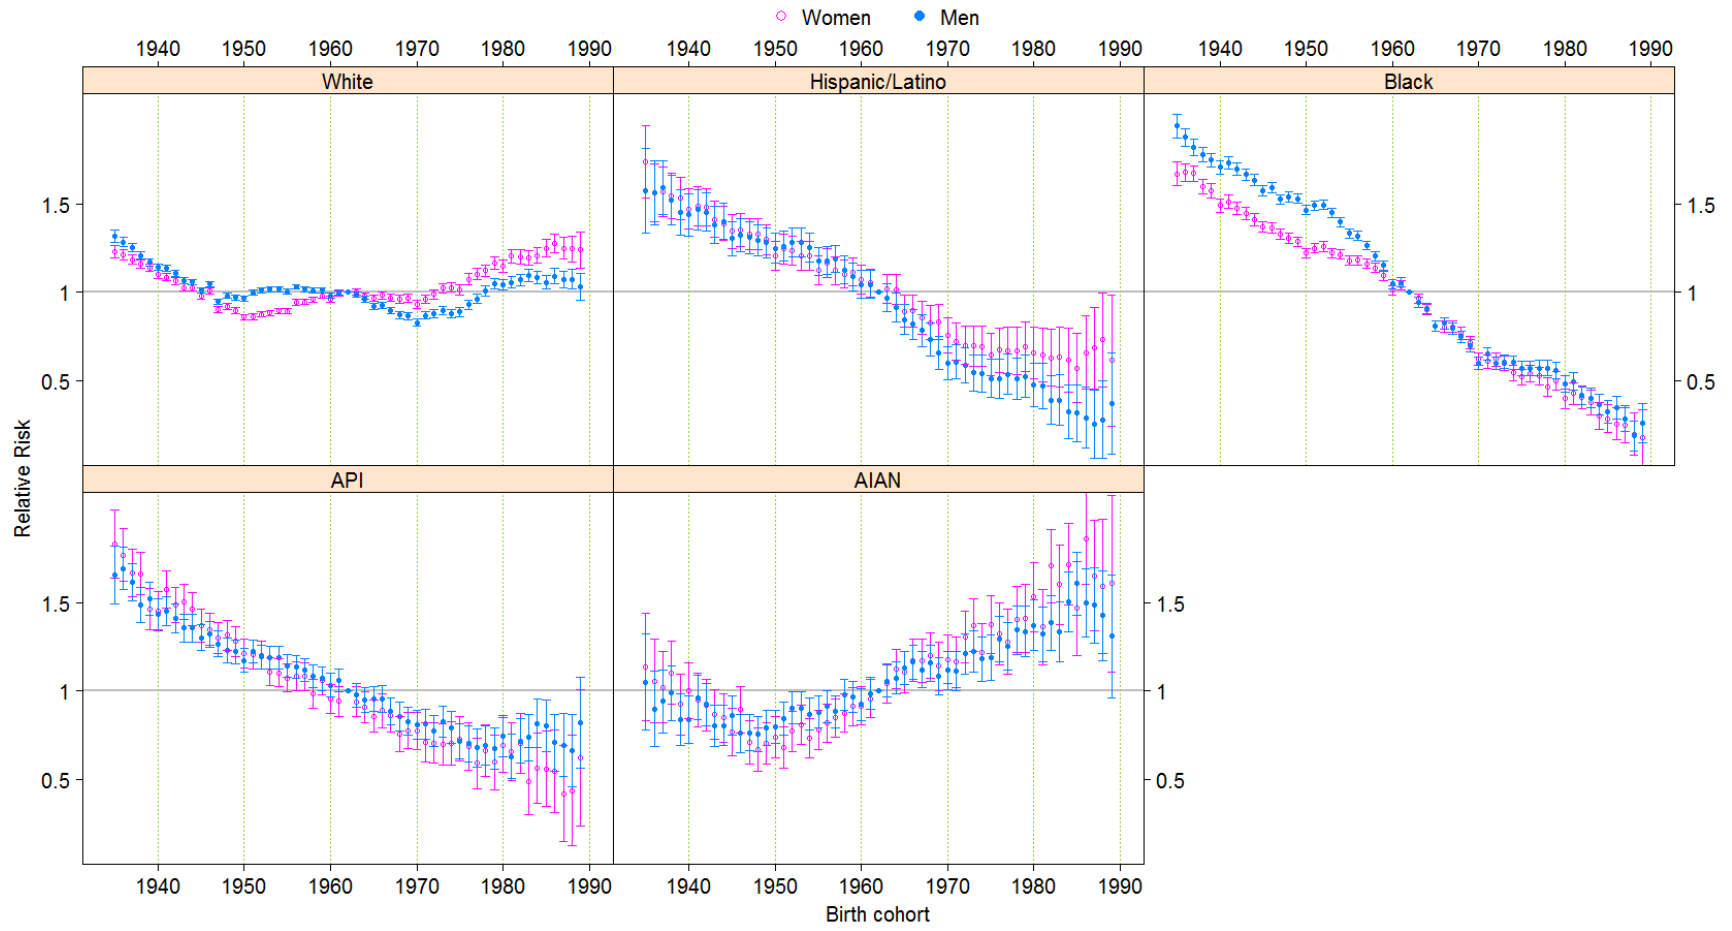

**Figure S2. Age-adjusted mortality rates for deaths due to accidental poisonings by sex and race/ethnicity among 25-49 year-olds during 2011-2014.**

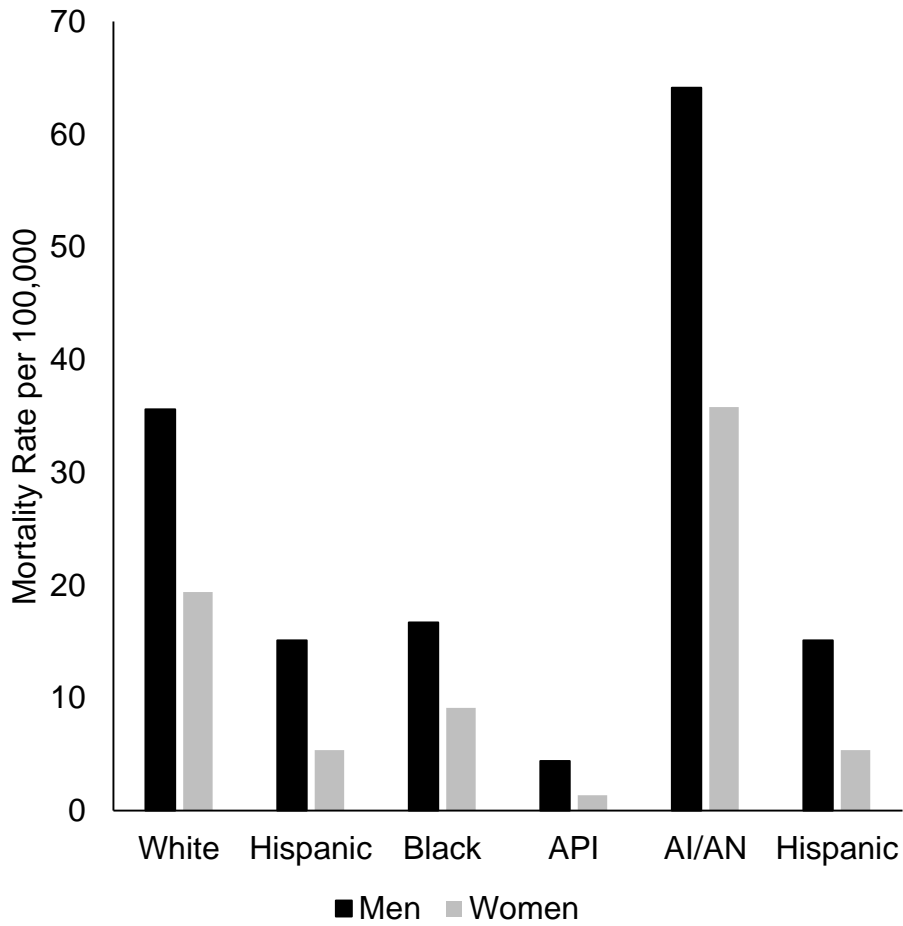

Supplement: NIHMS848151-supplement-01.pdf [file NIHMS848151-supplement-01.pdf]
